27           **ABSTRACT**

28   A large number of HIV-1 integrase (IN) alterations, referred to as class II substitutions, exhibit  
29   pleotropic effects during virus replication. However, the underlying mechanism for the class II  
30   phenotype is not known. Here we demonstrate that all tested class II IN substitutions  
31   compromised IN-RNA binding in virions by one of three distinct mechanisms: i) markedly  
32   reducing IN levels thus precluding formation of IN complexes with viral RNA; ii) adversely  
33   affecting functional IN multimerization and consequently impairing IN binding to viral RNA; iii)  
34   directly compromising IN-RNA interactions without substantially affecting IN levels or functional  
35   IN multimerization. Inhibition of IN-RNA interactions resulted in mislocalization of the viral  
36   ribonucleoprotein complexes outside the capsid lattice, which led to premature degradation of  
37   the viral genome and IN in target cells. Collectively, our studies uncover causal mechanisms for  
38   the class II phenotype and highlight an essential role of IN-RNA interactions for accurate virion  
39   maturation.

40

41           **INTRODUCTION**

42        Infectious HIV-1 virions are formed in a multistep process coordinated by interactions  
43   between the HIV-1 Gag and Gag-Pol polyproteins, and the viral RNA (vRNA) genome. At the  
44   plasma membrane of an infected cell, Gag and Gag-Pol molecules assemble around a vRNA  
45   dimer and bud from the cell as a spherical immature virion, in which the Gag proteins are  
46   radially arranged [1-3]. As the immature virion buds, the viral protease enzyme is activated and  
47   cleaves Gag and Gag-Pol into their constituent domains triggering virion maturation [1, 2].  
48   During maturation the cleaved nucleocapsid (NC) domain of Gag condenses with the RNA  
49   genome and *pol*-encoded viral enzymes [reverse transcriptase (RT) and integrase (IN)] inside  
50   the conical capsid lattice, composed of the cleaved capsid (CA) protein, which together form the  
51   core [1-3].

52           After infection of a target cell, RT in the confines of the reverse transcription  
53 complex (RTC) synthesizes linear double stranded DNA from vRNA [4]. The vDNA is  
54 subsequently imported into the nucleus, where the IN enzyme catalyzes its insertion into the  
55 host cell chromosome [5, 6]. Integration is mediated by the intasome nucleoprotein complex that  
56 consists of a multimer of IN engaging both ends of linear vDNA [7]. While the number of IN  
57 protomers required for intasome function varies across Retroviridae, single particle cryogenic  
58 electron microscopy (cryo-EM) structures of HIV-1 and Maedi-visna virus indicate that lentivirus  
59 integration proceeds via respective higher-order dodecamer and hexadecamer IN arrangements  
60 [8, 9], though a lower-order intasome comprised of an HIV-1 IN tetramer was also resolvable by  
61 cryo-EM [9].

62           A number of IN substitutions which specifically arrest HIV-1 replication at the integration  
63 step have been described [10]. These substitutions are grouped into class I to delineate them  
64 from a variety of other IN substitutions, which exhibit pleiotropic effects and are collectively  
65 referred to as class II substitutions [10-12]. Class II IN substitutions or deletion of entire IN  
66 impair proper particle assembly [11, 13-25], morphogenesis [11, 15, 21-23, 26-28] and reverse  
67 transcription in target cells [10, 11, 17, 19-21, 23, 25-44], in some cases without impacting IN  
68 catalytic function [15, 16, 19, 20, 30, 31, 34, 36, 45-47]. A hallmark morphological defect of  
69 these viruses is the formation of aberrant viral particles with viral ribonucleoprotein (vRNP)  
70 complexes mislocalized outside of the conical CA lattice [11, 15, 21-23, 26-28]. Strikingly similar  
71 morphological defects are observed in virions produced from cells treated with allosteric  
72 integrase inhibitors (ALLINIs, also known as LEDGInS, NCINIs, INLAIs or MINIs) [26, 27, 48-  
73 55]. ALLINIs induce aberrant IN multimerization in virions by engaging the V-shaped pocket at  
74 the IN dimer interface, which also provides a principal binding site for the host integration  
75 targeting cofactor lens epithelium-derived growth factor (LEDGF)/p75 [50, 54, 56-60]. The  
76 recent discovery that HIV-1 IN binds to the vRNA genome in virions and that inhibiting IN-RNA

77 interactions leads to the formation of eccentric particles provided initial clues about the role of IN  
78 during virion morphogenesis [28].

79 HIV-1 IN consists of three independently folded protein domains: the N-terminal domain  
80 (NTD), catalytic core domain (CCD), and C-terminal domain (CTD) [7, 61], and vRNA binding is  
81 mediated by a constellation of basic residues within the CTD [28]. However, class II IN  
82 substitutions are located throughout the entire length of the IN protein [10, 12], which raises the  
83 question as to how these substitutions impair virus maturation. The structural basis for IN  
84 binding to RNA is not yet known; however, in vitro evidence indicates that IN binds RNA as  
85 lower-order multimers, and conversely RNA binding may prevent the formation of higher order  
86 IN multimers [28]. Notably, aberrant IN multimerization underlies the inhibition of IN-RNA  
87 interactions by ALLINIs [28] and subsequent defects in virion maturation [26-28, 48, 49, 51-55].  
88 Therefore, it seems plausible that class II IN substitutions may exert their effect on virus  
89 replication by adversely affecting functional IN multimerization. However, a systematical  
90 evaluation of the effects of IN substitutions on IN multimerization, IN-RNA binding, and virion  
91 morphology is lacking. As such, it remains an open question how functional IN multimerization  
92 and/or IN-RNA interactions influence correct virion morphogenesis.

93 Eccentric virions generated via class II IN substitutions or ALLINI treatment are defective  
94 for reverse transcription in target cells [10, 11, 17, 19-21, 23, 25-44, 48, 49, 51, 54, 58, 62]  
95 despite containing equivalent levels of RT and vRNA genome as wild type (WT) particles [26,  
96 63]. In addition, neither the condensation of the viral genome by NC [26, 63] nor its priming [63]  
97 appear to be affected. We and others have recently shown that premature loss of the viral  
98 genome and IN, as well as spatial separation of RT from vRNPs, may underlie the reverse  
99 transcription defect observed in eccentric viruses generated in the presence of ALLINIs or the  
100 class II IN R269A/K273A substitutions [59, 64]. These findings support a model in which the  
101 capsid lattice or IN binding to vRNA itself is necessary to protect viral components from the host

102 environment upon entering a target cell. Whether the premature loss of the viral genome and IN  
103 is a universal outcome of other class II IN substitutions is unknown.

104 In this work, we aimed to determine the molecular basis of how class II IN substitutions  
105 exert their effects on HIV-1 replication. In particular, by detailed characterization of how class II  
106 substitutions impact IN multimerization, IN-RNA interactions and virion morphology, we aimed to  
107 dissect whether loss of IN binding to vRNA or aberrant IN multimerization underlies the  
108 pleiotropic defects observed in viruses bearing class II IN mutations. Remarkably, we found that  
109 class II substitutions either prevented IN binding to the vRNA genome or precluded the  
110 formation of IN-vRNA complexes through reducing or eliminating IN from virions. We show that  
111 IN tetramers have a strikingly higher affinity towards vRNA than IN monomers or dimers, and a  
112 large number of class II IN substitutions inhibited IN binding to RNA indirectly through  
113 modulating functional IN tetramerization. In contrast, R262A/R263A and R269A/K273A  
114 substitutions within the CTD and the K34A change within the NTD did not perturb IN tetramer  
115 formation, and thus likely directly interfered with IN binding to RNA. Irrespective of how IN-RNA  
116 binding was inhibited, all class II IN mutant viruses formed eccentric particles with vRNPs  
117 mislocalized outside of the CA lattice. Subsequently, this led to premature loss of the vRNA  
118 genome as well as IN, and spatial separation of RT and CA from the vRNPs in target cells.  
119 Taken together, our findings uncover causal mechanisms for the class II phenotype and  
120 highlight the essential role of IN-RNA interactions for the formation of correctly matured virions  
121 and vRNP stability in HIV-1-infected cells.

122

## 123 **MATERIALS AND METHODS**

124

### 125 **Plasmids**

126 The pNLGP plasmid consisting of the HIV-1<sub>NL4-3</sub>-derived Gag-Pol sequence inserted into the  
127 pCR/V1 plasmid backbone [65] and the CCGW vector genome plasmid carrying a GFP reporter

128 under the control of the CMV promoter [66, 67] were previously described. The pLR2P-vprIN  
129 plasmid expressing a Vpr-IN fusion protein has also been previously described [68]. Mutations  
130 in the IN coding sequence were introduced into both the pNLGP plasmid and the HIV-1<sub>NL4-3</sub> full-  
131 length proviral plasmid (pNL4-3) by overlap extension PCR. Briefly, forward and reverse primers  
132 containing IN mutations in the *pol* reading frame were used in PCR reactions with antisense and  
133 sense outer primers containing unique restriction endonuclease sites (AgeI-sense, NotI-  
134 antisense for NLGP and AgeI-sense, EcoRI-antisense for pNL4-3), respectively. The resulting  
135 fragments containing the desired mutations were mixed at 1:1 ratio and overlapped  
136 subsequently using the sense and antisense primer pairs. The resulting fragments were  
137 digested with the corresponding restriction endonucleases and cloned into pNLGP and pNL4-3  
138 plasmids. IN mutations were introduced into the pLR2P-vprIN plasmid using the QuickChange  
139 Site-Directed Mutagenesis kit (Agilent Technologies). Presence of the desired mutations and  
140 absence of unwanted secondary changes were verified by Sanger sequencing.

#### 141 **Cells and viruses**

142 HEK293T cells (ATCC CRL-11268) and HeLa-derived TZM-bl cells (NIH AIDS Reagent  
143 Program) were maintained in Dulbecco's modified Eagle's medium supplemented with 10% fetal  
144 bovine serum. MT-4 cells were maintained in RPMI 1640 medium supplemented with 10% fetal  
145 bovine serum. CHO K1-derived pgsA-745 cells (CRL-2242, ATCC) that lack a functional  
146 xylosyltransferase enzyme and as a result do not produce glycosaminoglycans were maintained  
147 in Dulbecco's modified Eagle's / F12 (1:1) media supplemented with 10% fetal bovine serum  
148 and 1 mM L-glutamine. Single-cycle GFP reporter viruses pseudotyped with vesicular stomatitis  
149 virus G protein (VSV-G) were produced by transfection of HEK293T cells with pNLGP-derived  
150 plasmids, the CCGW vector genome carrying GFP, and VSV-G expression plasmid at a ratio of  
151 5:5:1, respectively, using polyethyleneimine (PolySciences, Warrington, PA). Full-length viruses  
152 pseudotyped with VSV-G were produced by transfecting HEK293T cells with the pNL4-3-  
153 derived plasmids and VSV-G plasmid at a ratio of 4:1 (pNL4-3:VSV-G).

## 154 **Immunoblotting**

155 Viral and cell lysates were resuspended in sodium dodecyl sulfate (SDS) sample buffer and  
156 separated by electrophoresis on Bolt 4-12% Bis-Tris Plus gels (Life Technologies), blotted onto  
157 nitrocellulose membranes and probed overnight at 4°C with the following antibodies in Odyssey  
158 Blocking Buffer (LI-COR): mouse monoclonal anti-HIV p24 antibody (183-H12-5C, NIH AIDS  
159 reagents), mouse monoclonal anti-HIV integrase antibody [69], rabbit polyclonal anti-HIV  
160 integrase antibody raised in-house against Q44-LKGEAMHGQVD-C56 peptide and hence  
161 unlikely to be affected by the substitutions introduced into IN in this study, rabbit polyclonal anti-  
162 HIV-1 reverse transcriptase antibody (6195, NIH AIDS reagents), rabbit polyclonal anti-Vpr  
163 antibody (11836, NIH AIDS Reagents), rabbit polyclonal anti-MA antibody (4811, NIH AIDS  
164 Reagents). Membranes were probed with fluorophore-conjugated secondary antibodies (LI-  
165 COR) and scanned using a LI-COR Odyssey system. IN and CA levels in virions were  
166 quantified using Image Studio software (LI-COR). For analysis of the fates of core components  
167 in infected cells, antibody incubations were done using 5% non-fat dry milk. Membranes were  
168 probed with HRP-conjugated secondary antibodies and developed using SuperSignal™ West  
169 Femto reagent (Thermo-Fisher).

## 170 **Analysis of reverse transcription products in infected cells**

171 MT-4 cells were grown in 24-well plates and infected with VSV-G pseudotyped pNL4-3 viruses  
172 (either WT or class II IN mutant) at a multiplicity of infection (MOI) of 2 in the presence of  
173 polybrene. Six h post-infection cells were collected, pelleted by brief centrifugation, and  
174 resuspended in PBS. DNA was extracted from cells using the DNeasy Blood and Tissue Kit  
175 (Qiagen) as per kit protocol. Quantity of HIV-1 vDNA was measured by Q-PCR using primers  
176 specific for early reverse-transcripts.

## 177 **Vpr-IN transcomplementation experiments**

178 A class I IN mutant virus (HIV-1<sub>NL4-3</sub> IN<sub>D116N</sub>) was trans-complemented with class II mutant IN  
179 proteins as described previously [68]. Briefly, HEK293T cells grown in 24-well plates were co-

180 transfected with a derivative of the full-length HIV-1<sub>NL4-3</sub> proviral plasmid bearing a class I IN  
181 substitution (pNL4-3<sub>D116N</sub>), VSV-G, and derivatives of the pLR2P-vprIN plasmid bearing class II  
182 IN mutations at a ratio of 6:1:3. Two days post-transfection cell-free virions were collected from  
183 cell culture supernatants. Integration capability of the trans-complemented class II IN mutants  
184 was tested by infecting MT-4 cells and measuring the yield of progeny virions in cell culture  
185 supernatants over a 6-day period as described previously [68]. In brief, MT-4 cells were  
186 incubated with virus inoculum in 96 V-bottom well plates for 4 h at 37°C after which the virus  
187 inoculum was washed away and replaced with fresh media. Immediately following removal of  
188 the virus inoculum and during the six subsequent days the quantity of virions present in the  
189 culture supernatant was quantified by measuring RT activity using a Q-PCR-based assay [70].

#### 190 **CLIP experiments**

191 CLIP experiments were conducted as previously described [28, 71, 72]. Cell-free HIV-1 virions  
192 were isolated from transfected HEK293T cells. Briefly, cells in 15-cm cell culture plates were  
193 transfected with 30 µg full-length proviral plasmid (pNL4-3) DNA containing the WT sequence or  
194 indicated *pol* mutations within the IN coding sequence. Cells were grown in the presence of 4-  
195 thiouridine for 16 h prior to virus harvest. Two days post transfection cell culture supernatants  
196 were collected and filtered through 0.22 µm filters and pelleted by ultracentrifugation through a  
197 20% sucrose cushion using a Beckman SW32-Ti rotor at 28,000 rpm for 1.5 h at 4°C. Virus  
198 pellets were resuspended in phosphate-buffered saline (PBS) and UV-crosslinked. Following  
199 lysis in RIPA buffer, IN-RNA complexes were immunoprecipitated using a mouse monoclonal  
200 anti-IN antibody [69]. Bound RNA was end-labeled with  $\gamma$ -<sup>32</sup>P-ATP and T4 polynucleotide  
201 kinase. The isolated protein-RNA complexes were separated by SDS-PAGE, transferred to  
202 nitrocellulose membranes and exposed to autoradiography films to visualize RNA. Lysates and  
203 immunoprecipitates were also analyzed by immunoblotting using antibodies against IN.

#### 204 **IN multimerization in virions**



205 HEK293T cells grown on 10-cm dishes were transfected with 10 µg pNL4-3 plasmid DNA  
206 containing the WT sequence or indicated *pol* mutations within IN coding sequence. Two days  
207 post-transfection cell-free virions collected from cell culture supernatants were pelleted by  
208 ultracentrifugation through a 20% sucrose cushion using a Beckman SW41-Ti rotor at 28,000  
209 rpm for 1.5 h at 4°C. Pelleted virions were resuspended in 1X PBS and treated with ethylene  
210 glycol bis(succinimidyl succinate) (EGS) (ThermoFisher Scientific), a membrane permeable  
211 crosslinker, at a concentration of 1 mM for 30 min at room temperature. Crosslinking was  
212 stopped by addition of SDS sample buffer. Samples were subsequently separated on 3-8% Tris-  
213 acetate gels and analyzed by immunoblotting using a mouse monoclonal anti-IN antibody [69].

#### 214 **Size exclusion chromatography (SEC)**

215 All of the mutations were introduced into a plasmid backbone expressing His<sub>6</sub> tagged pNL4-3-  
216 derived IN by QuikChange site directed mutagenesis kit (Agilent) [60]. His<sub>6</sub> tagged recombinant  
217 pNL4-3 WT and mutant INs were expressed in BL21 (DE3) *E. coli* cells followed by nickel and  
218 heparin column purification as described previously [60, 73]. Recombinant WT and mutant INs  
219 were analyzed on Superdex 200 10/300 GL column (GE Healthcare) with running buffer  
220 containing 20 mM HEPES (pH 7.5), 1 M NaCl, 10% glycerol and 5 mM BME at 0.3 mL/min flow  
221 rate. The proteins were diluted to 10 µM with the running buffer and incubated for 1 h at 4°C  
222 followed by centrifugation at 10,000g for 10 min. Multimeric form determination was based on  
223 the standards including bovine thyroglobulin (670,000 Da), bovine gamma-globulin (158,000  
224 Da), chicken ovalbumin (44,000 Da), horse myoglobin (17,000 Da) and vitamin B12 (1,350 Da).

#### 225 **Analysis of IN-RNA binding in vitro**

226 Following SEC of IN as above, individual fractions of tetramer, dimer and monomer forms were  
227 collected and their binding to TAR RNA was analyzed by an Alpha screen assay as described  
228 previously [28]. Briefly, 100 nM His<sub>6</sub> tagged IN fractions (tetramer, dimer and monomer) were  
229 incubated with nickel acceptor beads while increasing concentrations of biotinylated-TAR RNA

230 was incubated with streptavidin donor beads in buffer containing 100 mM NaCl, 1 mM MgCl<sub>2</sub>, 1  
231 mM DTT, 1 mg/mL BSA, 25 mM Tris (pH 7.4). Followed by 2-h incubation at 4°C, they were  
232 mixed and the reading was taken after 1 h incubation at 4°C by PerkinElmer Life Sciences  
233 Enspire multimode plate reader. The K<sub>d</sub> values were calculated using OriginLab software.

#### 234 **Virus production and transmission electron microscopy**

235 Cell-free HIV-1 virions were isolated from transfected HEK293T cells. Briefly, cells grown in two  
236 15-cm cell culture plates (10<sup>7</sup> cells per dish) were transfected with 30 µg full-length proviral  
237 plasmid (pNL4-3) DNA containing the WT sequence or indicated *pol* mutations within IN coding  
238 sequence using PolyJet DNA transfection reagent as recommended by the manufacturer  
239 (SignaGen Laboratories). Two days after transfection, cell culture supernatants were filtered  
240 through 0.22 µm filters and pelleted by ultracentrifugation using a Beckman SW32-Ti rotor at  
241 26,000 rpm for 2 h at 4°C. Fixative (2.5% glutaraldehyde, 1.25% paraformaldehyde, 0.03%  
242 picric acid, 0.1 M sodium cacodylate, pH 7.4) was gently added to resulting pellets, and samples  
243 were incubated overnight at 4°C. The following steps were conducted at the Harvard Medical  
244 School Electron Microscopy core facility. Samples were washed with 0.1 M sodium cacodylate,  
245 pH 7.4 and postfixed with 1% osmium tetroxide /1.5% potassium ferrocyanide for 1 h, washed  
246 twice with water, once with maleate buffer (MB), and incubated in 1% uranyl acetate in MB for 1  
247 h. Samples washed twice with water were dehydrated in ethanol by subsequent 10 minute  
248 incubations with 50%, 70%, 90%, and then twice with 100%. The samples were then placed in  
249 propyleneoxide for 1 h and infiltrated overnight in a 1:1 mixture of propyleneoxide and TAAB  
250 Epon (Marivac Canada Inc.). The following day the samples were embedded in TAAB Epon and  
251 polymerized at 60 °C for 48 h. Ultrathin sections (about 60 nm) were cut on a Reichert Ultracut-  
252 S microtome, transferred to copper grids stained with lead citrate, and examined in a JEOL  
253 1200EX transmission electron microscope with images recorded on an AMT 2k CCD camera.

254 Images were captured at 30,000x magnification, and over 100 viral particles per sample were  
255 counted by visual inspection.

### 256 **Equilibrium density sedimentation of virion core components in vitro**

257 Equilibrium density sedimentation of virion core components was performed as previously  
258 described [64]. Briefly, HEK293T cells grown in 10-cm cell culture plates were transfected with  
259 10 µg pNLGP plasmid DNA containing the WT sequence or indicated *pol* mutations within IN  
260 coding sequence. Two days post-transfection cell-free virions collected from cell culture  
261 supernatants were pelleted by ultracentrifugation through a 20% sucrose cushion using a  
262 Beckman SW41-Ti rotor at 28,000 rpm for 1.5 hr at 4°C. Pelleted viral-like particles were  
263 resuspended in PBS and treated with 0.5% Triton X-100 for 2 min at room temperature.  
264 Immediately after, samples were layered on top of 30-70% linear sucrose gradients prepared in  
265 1X STE buffer (100 mM NaCl, 10 mM Tris-Cl (pH 8.0), 1 mM EDTA) and ultracentrifuged using  
266 a Beckman SW55-Ti rotor at 28,500 rpm for 16 h at 4°C. Fractions (500 µL) collected from the  
267 top of the gradients were analyzed for IN, CA, and MA by immunoblotting as detailed above.

### 268 **Biochemical analysis of virion core components in infected cells**

269 Biochemical analysis of retroviral cores in infected cells was performed as described previously  
270 [74]. Briefly, pgsA-745 cells were infected with VSV-G pseudotyped single cycle GFP-reporter  
271 viruses or its derivatives synchronously at 4°C. Following the removal of virus inoculum and  
272 extensive washes with PBS, cells were incubated at 37°C for 2 h. To prevent loss of vRNA due  
273 to reverse-transcription, cells were infected in the presence of 25 µM nevirapine. Post-nuclear  
274 supernatants were separated by ultracentrifugation on 10-50% linear sucrose gradients using a  
275 Beckman SW55-Ti rotor at 30,000 rpm for 1 h at 4°C. Ten 500 µl fractions from the top of the  
276 gradient were collected, and CA, IN, and vRNA in each fraction were analyzed by either  
277 immunoblotting or Q-PCR [74]. A SYBR-Green-based Q-PCR assay [70] was used to determine  
278 RT activity in the collected sucrose fractions.

### 279 **Visualization of vRNA in infected cells**

280 Viral RNA was visualized in infected cells according to the published multiplex  
281 immunofluorescent cell-based detection of DNA, RNA and Protein (MICDDRP) protocol [75].  
282 VSV-G pseudotyped HIV-1<sub>NL4-3</sub> virus stocks were prepared as described above and  
283 concentrated 40X using a lentivirus precipitation solution (ALSTEM). PgsA-745 cells were  
284 plated on 1.5 mm collagen-treated coverslips (GG-12-1.5-Collagen, Neuvitro) placed in 24-well  
285 plates one day prior to infection. Synchronized infections were performed by incubating pre-  
286 chilled virus inoculum on the cells for 30 min at 4°C. Cells were infected with WT virus at a MOI  
287 of 0.5, or with an equivalent number (normalized by RNA copy number) of IN mutant viral  
288 particles. After removal of the virus inoculum cells were washed with PBS and either  
289 immediately fixed with 4% paraformaldehyde, or incubated at 37°C for 2 h before fixing. To  
290 prevent loss of vRNA due to reverse-transcription, cells were infected and incubated in the  
291 presence of 25 µM nevirapine. Following fixation, cells were dehydrated with ethanol and stored  
292 at -20°C. Prior to probing for vRNA, cells were rehydrated, incubated in 0.1% Tween in PBS for  
293 10 min, and mounted on slides. Probing was performed using RNAScope probes and reagents  
294 (Advanced Cell Diagnostics). Briefly, coverslips were treated with protease solution for 15 min in  
295 a humidified HybEZ oven (Advanced Cell Diagnostics) at 40 °C. The coverslips were then  
296 washed with PBS and pre-designed anti-sense probes [75] specific for HIV-1 vRNA were  
297 applied and allowed to hybridize with the samples in a humidified HybEZ oven at 40 °C for 2 h.  
298 The probes were visualized by hybridizing with preamplifiers, amplifiers, and finally, a  
299 fluorescent label. First, pre-amplifier 1 (Amp 1-FL) was hybridized to its cognate probe for 30  
300 min in a humidified HybEZ oven at 40 °C. Samples were then subsequently incubated with Amp  
301 2-FL, Amp 3-FL, and Amp 4A-FL for 15 min, 30 min, and 15 min respectively. Between adding  
302 amplifiers, the coverslips were washed with a proprietary wash buffer. Nuclei were stained with  
303 DAPI diluted in PBS at room temperature for 5 min. Finally, coverslips were washed in PBST  
304 followed by PBS and then mounted on slides using Prolong Gold Antifade.

### 305 **Microscopy and image quantification**

306 Images were taken using a Zeiss LSM 880 Airyscan confocal microscope equipped with a  
307 ×63/1.4 oil-immersion objective using the Airyscan super-resolution mode. 10 images were  
308 taken for each sample using the ×63 objective. Numbers of nuclei and vRNA punctae in images  
309 were counted using Volocity software (Quorum Technologies). The number of vRNA punctae  
310 per 100 nuclei were recorded at 0 h post-infection (hpi) and 2 hpi for each virus, and the number  
311 at 2 hpi compared to the number at 0 hpi.

### 312 **Analysis of the fate of vRNA genome in MT4 cells**

313 MT-4 cells were infected with VSV-G pseudotyped HIV-1 NL4-3 WT or equivalent number of  
314 mutant viruses (normalized by RT activity) synchronously at 4°C. After removal of virus  
315 inoculum and extensive washes with PBS, cells were incubated at 37°C for 6 h in the presence  
316 of 25 µM nevirapine. Immediately after synchronization (0 h) and at 2 and 6 h post-infection  
317 samples were taken from the infected cultures and RNA was isolated using TRIzol Reagent.  
318 The amount of viral genomic RNA was measured by Q-RT-PCR.

319

## 320 **RESULTS**

### 321 **Characterization of the replication defects of class II IN mutant viruses**

322 Substitutions in IN that exhibited a class II phenotype (i.e. assembly, maturation or  
323 reverse transcription defects [10-44, 76, 77] or affected IN multimerization [46, 78-81] were  
324 selected from past literature. The location of these substitutions depicted on the cryo-EM  
325 structure of the tetrameric HIV-1 intasome complex [9] indicate that many are positioned at or  
326 near monomer-monomer or dimer-dimer interfaces (Fig. 1A-B). While not apparent in the  
327 tetrameric intasome complex, the CTD mediates IN tetramer-tetramer interactions in the higher-  
328 order dodecamer IN structure [9] and has also been shown to mediate IN multimerization in vitro  
329 [15].

330 IN mutations were introduced into the replication competent pNL4-3 molecular clone and  
331 HEK293T cells were transfected with the resulting plasmids. Cell lysates and cell-free virions  
332 were subsequently analyzed for Gag/Gag-Pol expression, processing, particle release and  
333 infectivity. While substitutions in IN had no measurable effect on Gag (Pr55) expression, modest  
334 effects on Gag processing in cells was visible for several missense mutant viruses including  
335 H12N, N18I, K34A, Y99A, K103E, W108R, F185K, Q214L/Q216L, L242A, V260E, as well as  
336 the  $\Delta$ IN mutant (Fig. 2A). Nevertheless, particle release was largely similar between WT and IN  
337 mutant viruses, as evident by the similar levels of CA protein present in cell culture supernatants  
338 (Fig. 2A, lower panels).

339 Three distinct phenotypes became apparent by assessing the amount of virion-  
340 associated IN and RT enzymes (Fig. 2A and Fig. S1A). First, virion-associated IN was at least  
341 5-fold less than WT with several mutants, including H12N, N18I, K103E, W108R, F185K,  
342 L242A, and V260E (Fig. 2A and Table 1). Notably, these substitutions also reduced levels of  
343 Gag-Pol processing intermediates in producer cells (Fig. 2A) and RT in virions (Fig. 2A and Fig.  
344 S1A), suggesting that they likely destabilized the Gag-Pol precursor. Near complete lack of  
345 processing intermediates with the K14A and N18I substitutions, despite the presence of fully  
346 processed RT and IN in virions (detected using a separate polyclonal antibody), is likely due to  
347 inaccessibility of epitopes recognized by the monoclonal anti-IN antibody in the processing  
348 intermediates. Second, the R228A substitution abolished full-length IN in virions without  
349 impacting cell- or virion-associated Gag-Pol levels or processing intermediates; however, a  
350 faster migrating species due to altered charge in IN or that may represent product of aberrant IN  
351 processing and/or IN degradation was visible. A similar but more modest defect was observed  
352 for the K34A mutant, which was incorporated into virions at a modestly reduced level alongside  
353 a smaller protein species. Third, the remainder of the IN substitutions did not appear to affect IN  
354 or Gag-Pol levels in cells or virions.

355           With the exception of E96A, nearly all of the IN substitutions reduced virus titers at least  
356 100-fold compared to the WT (Fig. 2B), which corresponded with reduced levels of reverse-  
357 transcription in infected cells (Fig. 2C). In line with previous reports [19, 20, 34], class II mutant  
358 IN molecules had variable levels of catalytic activity as assessed by the ability of Vpr-IN proteins  
359 to transcomplement a catalytically inactive IN (D116N, [11, 45]) in infected cells [68, 82]. All  
360 Vpr-IN fusion proteins, except for the H12N mutant which likely decreased the stability of the  
361 Vpr-IN fusion protein, were expressed at similar levels in cells (Fig. S1B). We found that K14A,  
362 E96A, Y99A, K103A, V165A, R187A, K188E R199A, K236E, and R269A/R273A IN mutants  
363 trans-complemented a catalytically inactive IN at levels similar to the WT, whereas W108R,  
364 R228A, and V260E mutants were unable to do so (Fig. 2D-E). The inability of W108R, R228A,  
365 and V260E mutants to transcomplement implies that they are impaired for integration, a result in  
366 line with previous observations [46, 81]. The remainder of the IN mutants restored integration,  
367 albeit at significantly lower than WT levels (Fig. 2D-E). These results suggest that the majority of  
368 the class II mutant INs retain structural integrity and at least partial catalytic activity in the  
369 presence of a complementing IN protein. Cumulatively, these data show that some class II  
370 substitutions in IN can affect the stability and/or processing of virion associated proteins, but  
371 they all universally lead to the formation of non-infectious virions that are blocked at reverse  
372 transcription in target cells, a hallmark of class II IN substitutions [10, 12].

### 373           **Class II IN mutants abolish IN binding to RNA**

374           Using complementary in vitro and CLIP-based approaches, we have previously shown  
375 that IN interacts with the viral genome through multiple basic residues (i.e. K264, K266, R269,  
376 K273) in its CTD [28]. In addition, IN-RNA interactions could also depend on proper IN  
377 multimerization, as ALLINI-induced aberrant IN multimerization potently inhibited the ability of IN  
378 to bind RNA [28]. Based on this, in the next set of experiments, we aimed to determine whether

379 class II IN mutants bind vRNA, and if not, whether improper IN multimerization may underlie this  
380 defect.

381 IN-vRNA complexes were immunoprecipitated from UV-crosslinked virions and the  
382 levels of coimmunoprecipitating vRNA was assessed. Note that substitutions that significantly  
383 reduced the amount of IN in virions (Fig. 2A, Table 1) were excluded from these experiments.  
384 All class II IN mutant viruses contained similar levels of vRNA, ruling out any inadvertent effects  
385 of the alterations on RNA packaging (Fig. 3A). While the catalytically inactive IN D116N bound  
386 vRNA at a level that was comparable to the WT, nearly all of the class II IN mutant proteins  
387 failed to bind vRNA (Fig. 3B). The E96A substitution, which had a fairly modest effect on virus  
388 titers as compared to other IN mutants (Fig. 2B), decreased but did not abolish the ability of IN  
389 to bind RNA (Fig. 3B). Thus, lack of RNA binding ability is a surprisingly common property of a  
390 disperse set of class II IN mutants, despite the fact that many of the altered amino acid residues  
391 are distally located from the CTD.

### 392 **IN multimerization plays a key role in RNA binding**

393 As it seemed unlikely that all of the class II IN substitutions directly inhibited IN binding to  
394 RNA, we reasoned that they might indirectly abolish binding by perturbing proper IN  
395 multimerization. To test whether class II IN substitutions altered IN multimerization in a relevant  
396 setting, purified HIV-1<sub>NL4-3</sub> virions were treated with ethylene glycol bis (succinimidyl succinate)  
397 (EGS) to covalently crosslink IN in situ and virus lysates were analyzed by immunoblotting. IN  
398 species that migrated at molecular weights consistent with those of monomers, dimers, trimers  
399 and tetramers were readily distinguished in WT virions (Fig. 4A). In the majority of the class II  
400 mutant particles, IN appeared to be predominantly monomeric, with little dimers and no readily  
401 detectable tetramers (Fig. 4A). In contrast to this general pattern, K34A, E96A, R262A/R263A  
402 and R269A/K273A IN mutants formed dimers and tetramers at similar levels to the WT (Fig.



403 4A). An undefined smear was present at higher molecular weights for all virions, possibly as a  
404 result of the formation of large IN aggregates upon cross-linking (Fig. 4A).

405 To corroborate these findings, we analyzed the multimerization properties of  
406 recombinant WT, K34A, E96A, K188E, K236A and R262A/R263A IN proteins by SEC (Fig. 4B).  
407 In line with the crosslinking studies in virions, WT, K34A and R262A/R263A IN molecules all  
408 formed tetramers, while the levels of dimers varied between the mutants. For example, while IN  
409 R262A/R263A presented similar levels of tetramers and dimers, IN K34A was primarily  
410 tetrameric with a minor dimeric species, as evident by the broad right shoulder of the tetrameric  
411 SEC peak (Fig. 4B). In contrast, E96A and K188E IN molecules almost exclusively formed  
412 dimers and monomers with little evidence for tetramer formation (Fig. 4B). While K236E IN was  
413 predominantly dimeric, the broad base of its chromatogram revealed some evidence for  
414 tetramers and monomers as well (Fig. 4B).

415 We next determined the ability of IN monomers, dimers and tetramers to bind RNA to  
416 test whether there is a causal link between the multimerization defects of class II IN  
417 substitutions and RNA binding. Following size-exclusion chromatography (SEC)-based  
418 separation of monomeric, dimeric and tetrameric IN, their affinity for TAR RNA, which  
419 constitutes a high affinity binding site for IN [28], was assessed by an Alpha-screen assay.  
420 Remarkably, while WT IN tetramers bound to TAR RNA at high affinity ( $2.68 \pm 0.16$  nM), neither  
421 IN dimers nor monomers showed evidence of binding (Fig. 4C). Although IN K34A and IN  
422 R262A/R263A could both form tetramers, IN K34A showed a reduced affinity for RNA while IN  
423 R262A/R263A could not bind RNA at all (Fig. 4D).

424 Collectively, these results pointed to a key role of IN tetramerization in RNA binding and  
425 suggest that a defect in proper multimerization underlies the inability of the majority of class II IN  
426 mutants to bind vRNA. As the K34A and R262A/R263A substitutions did not affect IN

427 tetramerization, our findings suggest that these residues may be directly involved in IN binding  
428 to RNA.

### 429 **Class II IN substitutions generate virions with eccentric morphology**

430 We next sought to determine how preclusion or inhibition of IN-vRNA interactions  
431 correlated with particle morphology. Virion morphology of a subset of the IN mutants that  
432 inhibited vRNA interactions by three different mechanisms; i.e. those that decreased IN levels in  
433 virions (N18I and W108R), those that may have directly inhibited IN binding to RNA (K34A,  
434 R262A/R263A), and those that primarily altered IN multimerization (E87A, E96A, F185K,  
435 R187A, L241A, L242A), was assessed by transmission electron microscopy (TEM). As  
436 expected, the majority of WT particles contained an electron dense condensate representing  
437 vRNPs inside the CA lattice, whereas an  $\Delta$ RT-IN deletion mutant virus produced similar levels  
438 of immature particles and eccentric particles (Fig. 5A-B). Remarkably, irrespective of how IN-  
439 RNA interactions were inhibited, 70-80% of nearly all class II IN mutant particles exhibited an  
440 eccentric morphology (Fig. 5A-B). Of note, the E96A mutant tended to produce less eccentric  
441 and more mature particles than the other IN mutants. Because IN E96A retained partial binding  
442 to vRNA in virions (Fig. 3B) and partial infectivity (Fig. 2B), we conclude that this infection-  
443 deferred mutant harbors a partial class II phenotype.

444 Next, we tested whether inhibition of IN-RNA interactions through class II substitutions  
445 changes the localization of IN in virions. The premise for this is based on our previous finding  
446 that disruption of IN binding to vRNA through the IN R269A/K273A substitution leads to  
447 separation of a fraction of IN from dense vRNPs and CA containing complexes [64]. Thus, we  
448 predicted that inhibition of IN-RNA interactions through the above class II substitutions could  
449 lead to a similar outcome. To this end, WT or class II IN mutant virions stripped of the viral lipid  
450 envelope by brief detergent treatment were separated on sucrose gradients, and resulting  
451 fractions were analyzed for CA, IN, and matrix (MA) content by immunoblotting [64, 83]. As

452 before [64], WT IN migrated primarily in dense fractions, whereas the R269A/K273A mutant  
453 migrated bimodally (Fig. 6A, B). In contrast to our hypothesis, the majority of IN mutants  
454 sedimented similarly to WT IN and settled in the denser gradient fractions (Fig. 6A, B).  
455 Exceptions were the K34A and R262A/R263A IN mutants, a fraction of which migrated in  
456 soluble fractions similar to the R269A/K273A mutant, suggesting their localization outside of the  
457 capsid lattice. None of the IN substitutions affected the migration pattern of CA (Fig. 6C), which  
458 distributed bimodally between the soluble and dense fractions, nor the distribution of MA (data  
459 not shown), which was found in mainly the soluble fractions. These results suggested that, with  
460 the exception of the K34A, R262A/R263A, and R269A/K273A, IN mutant proteins may remain  
461 associated with the CA lattice despite inhibition of IN-vRNA interactions.

#### 462 **Premature loss of vRNA and IN from class II IN mutant viruses upon infection of target** 463 **cells**

464 We have previously shown that vRNA and IN are prematurely lost from cells infected  
465 with the R269A/K273A class II IN mutant [64]. Given that eccentric vRNP localization is a  
466 common feature of class II IN mutant viruses (Fig. 5), we next asked whether loss of vRNA in  
467 target cells is a common outcome for other class II IN mutant viruses. As the majority of mutant  
468 IN molecules appeared to remain associated with higher-order CA in virions (Fig. 6), we also  
469 wanted to test whether they would be protected from premature degradation in infected cells.

470 The fates of viral core components in target cells were tracked using a previously  
471 described biochemical assay [74]. For these experiments we utilized pgsA-745 cells (pgsA),  
472 which lack surface glycosaminoglycans, and likely as a result can be very efficiently infected by  
473 VSV-G-pseudotyped viruses in a synchronized fashion. PgsA cells were infected with WT or IN  
474 mutant viruses bearing substitutions that inhibited IN-vRNA interactions directly and led to  
475 mislocalization of IN in virions (i.e. K34A, R262A/R263A, R269A/K273A) or indirectly through  
476 aberrant IN multimerization and did not appear to grossly affect IN localization in virions (i.e.

477 E87A, V165A) (Fig 7A). Following infection, post-nuclear lysates were separated on linear  
478 sucrose gradients, and fractions collected from gradients were analyzed for viral proteins (CA,  
479 IN, RT) and vRNA by immunoblotting and Q-PCR-based assays, respectively.

480 As previously reported [64, 74], in cells infected with WT viruses, IN, RT, vRNA and a  
481 fraction of CA comigrated in sucrose fractions 6-8, representing active RTCs (Fig. 7B-E). Note  
482 that a large fraction of CA migrated in the top two soluble sucrose fractions representing CA that  
483 had dissociated from the core as a result of uncoating or CA that was packaged into virions but  
484 not incorporated into the capsid lattice [84, 85]. Notably, in cells infected with class II IN mutant  
485 viruses, equivalent levels of CA (Fig. 7B) and RT (Fig. 7D) remained in the denser fractions,  
486 whereas IN (Fig. 7C) and vRNA (Fig. 7E) were substantially reduced. Loss of vRNA and IN from  
487 dense fractions, without any corresponding increase in the top fractions containing soluble  
488 proteins and RNA, suggest their premature degradation and/or mislocalization in infected cells.

489 We next employed a complementary microscopy-based assay [75] in the context of full-  
490 length viruses to corroborate these findings. Advantages of this approach over biochemical  
491 fractionation experiments include the ability to track HIV-1 vRNA at the single-cell level with a  
492 high degree of specificity (Fig. S2A), determine its subcellular localization, and to side-step  
493 possible post-processing artifacts associated with biochemical fractionation. Cells were  
494 synchronously infected with VSV-G pseudotyped HIV-1<sub>NL4-3</sub> in the presence of nevirapine to  
495 prevent vRNA loss due to reverse transcription, and vRNA levels associated with cells  
496 immediately following synchronization (0 h) and 2 h post-infection were evaluated [75]. In WT-  
497 infected cells, vRNA was clearly visible immediately after infection (Fig. 7F). Two h post  
498 infection, cell associated vRNA had fallen to 60-80% of starting levels (Fig. 7F, S2C), likely as  
499 the result of some viruses failing to enter or perhaps being degraded after entry. However, a  
500 significant proportion of vRNA was still readily detectable. In contrast, in cells infected with the  
501 IN mutant viruses the reduction in vRNA was greater, and by 2 h post-infection only 30-40%  
502 remained (Fig. 7F and Fig. S2B-C). These results support the conclusion from the biochemical

503 fractionation experiments that vRNA is prematurely lost from cells infected with class II IN  
504 mutant viruses.

505 Finally, we tested whether our findings held true in physiologically relevant human cells.  
506 MT-4 T cells were synchronously infected with WT or class II IN mutant VSV-G pseudotyped  
507 HIV-1<sub>NL4-3</sub> in the presence of nevirapine. Cells were collected immediately after synchronization  
508 (0 h), 2 and 6 h post-infection, and the quantity of vRNA measured by Q-PCR. In line with the  
509 above findings, vRNA levels decreased at a faster rate with the class II IN mutants as compared  
510 to WT viruses, with half as much cell-associated vRNA remaining at 2 and 6 h post-infection for  
511 the class II IN mutants (Fig. 7G). Treating cells with ammonium chloride to prevent fusion of the  
512 VSV-G pseudotyped viruses rescued vRNA loss, and vRNA from WT and mutant viruses were  
513 retained at equal levels, indicating that the loss of vRNA is dependent on entry into the target  
514 cell (Fig. S2D). These findings agree with the previous experiments and demonstrate that class  
515 II IN substitutions lead to the premature loss of vRNA genome also in human T cells.

## 516 DISCUSSION

517 Our findings highlight the critical role of IN-vRNA interactions in virion morphogenesis  
518 and provide the mechanistic basis for how diverse class II IN substitutions lead to similar  
519 morphological and reverse transcription defects. We propose that class II IN substitutions lead  
520 to the formation of eccentric particles through three distinct mechanisms (Fig. 8): (i) depletion of  
521 IN from virions thus precluding the formation of IN-vRNA complexes; ii) impairment of functional  
522 IN multimerization and as a result, indirect disruption of IN-vRNA binding; iii) direct disruption of  
523 IN-vRNA binding without substantially affecting IN levels or its inherent multimerization  
524 properties. Irrespective of how IN binding to vRNA is inhibited, all substitutions led to the  
525 formation of eccentric viruses that were subsequently blocked at reverse transcription in target  
526 cells. We provide evidence that premature degradation of the exposed vRNPs and separation of  
527 RT from the vRNPs underlies the reverse transcription defect of class II IN mutants (Fig. 7).

528 Taken together, our findings cement the view that IN binding to RNA accounts for the role of IN  
529 in accurate particle maturation and provide the mechanistic basis of why these viruses are  
530 blocked at reverse transcription in target cells.

531 In regard to the first case (i) above, it was previously shown that IN deletion leads to the  
532 formation of eccentric particles [11, 27]. Thus, it is reasonable to assume that missense  
533 mutations that decreased IN levels in virions phenocopy IN deletion viruses. While it is also  
534 possible that these substitutions additionally affected IN binding to vRNA or multimerization, we  
535 could not reliably address these possibilities due to the extremely low levels of these proteins in  
536 virions.

537 Our results show the striking affinity of IN tetramers to bind RNA compared with IN  
538 monomers and dimers (Fig. 4C). In support of tetramerization being a prerequisite for RNA-  
539 binding, the inability of a number of class II IN mutant proteins to bind RNA was accompanied  
540 by a clear multimerization defect both in virions (Fig. 4A) and in vitro (Fig. 4B). The structural  
541 basis for IN binding to RNA is not yet known; however, these findings are in line with the  
542 previous in vitro evidence that hinted a link between IN multimerization and RNA-binding. For  
543 example, IN binds RNA as lower-order multimers, and conversely RNA binding may inhibit the  
544 formation of higher order IN multimers in vitro [28]. Notably, formation of open IN polymers that  
545 occlude the IN CTD from RNA binding may underlie the inhibition of IN-RNA interactions by  
546 ALLINIs [28, 58].

547 Based on MS-based footprinting experiments in vitro, we previously found that positively  
548 charged residues within the CTD of IN (i.e. K264, K266, K273) directly contact RNA, as was  
549 also validated by CLIP experiments [28]. Our findings here suggest that IN-vRNA contacts may  
550 extend to nearby basic residues within the CTD, such as R262 and R263, and perhaps more  
551 surprisingly, K34 within the IN NTD, as alterations of these residues did not prevent IN  
552 tetramerization (Fig. 4A-B) but completely abolished IN-vRNA binding in virions (Fig. 3B) and

553 reduced RNA-binding in vitro (Fig 4D). This raises the possibility of a second RNA-binding site  
554 in the IN NTD. Structural analysis of IN in complex with RNA will be essential to definitively  
555 determine how IN binds RNA as well as the precise multimeric species required for binding.

556         The mechanism by which IN-vRNA interactions mediate the encapsidation of vRNPs  
557 inside the CA lattice remains unknown. One possibility is that the temporal coordination of  
558 proteolytic cleavage events during maturation is influenced by IN-vRNA interactions [86, 87]. In  
559 this scenario, the assembly of the CA lattice may become out of sync with the compaction of  
560 vRNA by NC. Another possibility is that IN-vRNA complexes nucleate the assembly of the CA  
561 lattice, perhaps by directly binding to CA. Notably, the biochemical assays performed herein  
562 show that class II IN substitutions do not appear to affect the assembly and stability of the CA  
563 lattice in vitro and in target cells. Although this finding is in disagreement with the previously  
564 observed morphological aberrations of the CA lattice present in eccentric particles [26], it is  
565 possible that the biochemical experiments used herein lack the level of sensitivity required to  
566 quantitatively assess these aberrations. Further studies deciphering the crosstalk between IN-  
567 RNA interactions and CA assembly will be critical to our understanding of the role of IN in  
568 accurate virion maturation.

569         While the mislocalization of the vRNA genome in eccentric particles can be accurately  
570 assessed by TEM analysis, precisely where IN is located in eccentric particles remains an open  
571 question. Earlier studies based on biochemical separation of core components from detergent-  
572 treated IN R269A/K273A virions indicated that IN may also mislocalize outside the CA lattice  
573 [64]. In this study, only two class II IN mutants (K34A and R262A/R263A) revealed this  
574 phenotype (Fig. 6A, B). It is intriguing that the bimodal distribution of IN in this experimental  
575 setting was only seen with IN mutants that directly inhibited IN binding to vRNA. A possible  
576 explanation for these observations is that improperly multimerized IN is retained within the CA  
577 lattice or in association with it. Despite this co-migration pattern with CA, we found that both

578 E87A and V165A mutant INs were rapidly lost in infected cells, suggesting that they are not fully  
579 protected by CA upon cellular entry (Fig. 7C).

580         Why is the unprotected vRNA and IN prematurely lost in target cells? It seems evident  
581 that the protection afforded by the CA lattice matters the most for vRNP stability, though we  
582 cannot rule out that IN binding to vRNA may in and of itself stabilize both the genome and IN.  
583 Alternatively, the AU-rich nucleotide content of HIV-1 may destabilize its RNA [88-90], similar to  
584 several cellular mRNAs that encode for cytokines and growth factors [91]. Finally, RNA nicking  
585 and deadenylation in virions by virion associated enzymes [92-94] may predispose retroviral  
586 genomes to degradation when they are prematurely exposed to the cytosolic milieu. While  
587 cytosolic IN undergoes proteasomal degradation when expressed alone in cells [95-99], we  
588 have found previously that proteasome inhibition does not rescue vRNA or IN in target cells  
589 infected with a class II IN mutant [64]. Further studies are needed to determine whether a  
590 specific cellular mechanism or an inherent instability of vRNPs is responsible from the loss of  
591 vRNA in infected cells.

592         In conclusion, we have identified IN-vRNA binding as the underlying factor for the role of  
593 IN in virion morphogenesis and show that virion morphogenesis is necessary to prevent the  
594 premature loss of vRNA and IN early in the HIV-1 lifecycle. Despite relatively high barriers,  
595 drugs that inhibit the catalytic activity of IN do select for resistance, and additional drug classes  
596 that inhibit IN activity through novel mechanisms of action would be a valuable addition to  
597 currently available treatments. The finding that IN-vRNA interaction can be inhibited in multiple  
598 ways- by directly altering residues in the IN CTD or by altering IN multimerization in virions- can  
599 help guide the design of future anti-retroviral compounds.

600

601 **FIGURE LEGENDS**



602 **Figure 1. Class II IN substitutions locate throughout IN and cluster at interfaces that**  
603 **mediate IN multimerization.**

604 (A) Location of class II IN substitutions used in this study displayed in red on a single IN  
605 monomer within the context of the HIV-1 IN tetramer intasome structure consisting of a dimer of  
606 dimers (PDB 5U1C). The two dimers are displayed in either gray or green, with individual  
607 monomers within each displayed in different shades. The DNA is omitted for clarity. (B) View of  
608 the structure displayed in A rotated 90°.

609

610 **Figure 2. Characterization of the replication defects of class II IN mutant viruses.**

611 (A) Immunoblot analysis of Gag and Gag-Pol products in cell lysates and virions. HEK293T cells  
612 were transfected with proviral HIV-1<sub>NL4-3</sub> expression plasmids carrying *pol* mutations encoding  
613 for the indicated IN substitutions. Cell lysates and purified virions were harvested two days post  
614 transfection and analyzed by immunoblotting for CA, IN and, in the case of virions, RT.  
615 Representative image of one of four independent experiments is shown. (B) Infectious titers of  
616 WT or IN mutant HIV-1<sub>NL4-3</sub> viruses in cell culture supernatants were determined on TZM-bl  
617 indicator cells. Titer values are expressed relative to WT (set to 1). Columns show average of  
618 five independent experiments (open circles) and error bars represent standard deviation (\*\*\*\*P  
619 < 0.0001, by one-way ANOVA with Dunnett's multiple comparison test). (C) Relative quantity of  
620 reverse-transcribed HIV-1 DNA in MT-4 target cells infected with HIV-1<sub>NL4-3</sub> at 6 hpi. Quantities  
621 of vDNA are expressed relative to WT (set to 1). Columns show average of three independent  
622 experiments (open circles) and error bars represent standard deviation (\*\*\*\*P < 0.0001, by one-  
623 way ANOVA with Dunnett's multiple comparison test). (D) Representative growth curve of HIV-  
624 1<sub>NL4-3</sub> IN<sub>D116N</sub> viruses trans-complemented with class II mutant IN proteins in cell culture. Y-axis  
625 indicates fold increase in virion yield over day 0 as measured by RT activity in culture  
626 supernatants. HIV-1<sub>NL4-3</sub> IN<sub>D116N</sub> viruses that were trans-complemented with WT IN, class II

627 mutant INs, IN<sub>D116N</sub>, or an empty vector are denoted as red, black, dark blue and light blue lines  
628 respectively. Representative plot from one of three independent experiments. (E) Fold increase  
629 in virions in culture supernatants at 4 dpi, as measured by RT activity in culture supernatants.  
630 Trans-complementation of the HIV-1<sub>NL4-3</sub> IN<sub>D116N</sub> virus with mutant IN molecules restored particle  
631 release to levels comparable to WT IN (red), partially restored particle release (gray) or could  
632 not restore particle release (blue). Columns show average of three independent experiments  
633 (open circles) and error bars represent standard deviation (\*P < 0.05 and \*\*P < 0.01, by paired t  
634 test between individual mutants and WT).

635

636 **Figure 3. Class II IN substitutions prevent IN binding to the vRNA genome in virions.**

637 (A) Analysis of the levels of packaged viral genomic RNA in WT and IN mutant HIV-1<sub>NL4-3</sub>  
638 virions. vRNA extracted from purified virions was measured by Q-PCR. Data was normalized to  
639 account for differences in particle yield using an RT activity assay. Normalized quantities of  
640 vRNA are expressed relative to WT (set to 1). Columns show the average of three-four  
641 independent experiments (open circles) and error bars represent standard deviation (ns, not  
642 significant, by one-way ANOVA). (B) Representative autoradiogram of IN-RNA adducts  
643 immunoprecipitated from WT or IN mutant HIV-1<sub>NL4-3</sub> virions. The amount of immunoprecipitated  
644 material was normalized such that equivalent levels of WT and mutant IN proteins were loaded  
645 on the gel, as also evident in the immunoblots shown below. Levels of IN and CA in input virion  
646 lysates is shown in the lower immunoblots. Data is representative of three independent  
647 replicates.

648

649 **Figure 4. Multimerization properties of class II IN mutants.**

650 (A) Immunoblot analyses of IN multimers in virions. Purified WT or IN mutant HIV-1<sub>NL4-3</sub> virions  
651 were treated with 1 mM EGS, and virus lysates analyzed by immunoblotting using antibodies  
652 against IN following separation on 6% Tris-acetate gels. Position of monomers (M), dimers (D),

653 and tetramers (T) are indicated by arrows. Representative image of one of three independent  
654 experiments is shown. (B) SEC profiles of 10  $\mu$ M INs by Superdex 200 10/300 GL column. X-  
655 axis indicates elution volume (mL) and Y-axis indicate the intensity of absorbance (mAU).  
656 Tetramers (T), Dimers (D) and Monomers (M) are indicated. Representative chromatograms  
657 from two independent analyses are shown. (C) Analysis by Alpha screen assay of 100 nM WT  
658 IN monomers, dimers, and tetramers binding to biotinylated TAR RNA after separation by SEC.  
659 Graphed data is the average of three independent experiments and error bars indicate standard  
660 deviation. (D) Analysis of 100 nM WT or mutant INs binding to biotinylated TAR RNA by Alpha  
661 screen assay. Graphed data is the average of three independent experiments and error bars  
662 indicate standard deviation.

663

#### 664 **Figure 5. Analysis of class II IN mutant virion morphologies viruses by TEM.**

665 (A) Representative TEM images of WT, K14A, N18I, K34A, E87A, E96A, W108R, F185K,  
666 R187A, L241A, L242A, R262A/R263A, and  $\Delta$ RT-IN HIV-1<sub>NL4-3</sub> virions. Magnification is 30,000x  
667 (scale bar, 100 nm). Black arrows indicate mature particles containing conical or round cores  
668 with associated electron density; triangles indicate eccentric particles with electron dense  
669 material situated between translucent cores and the viral membrane; diamonds indicate  
670 immature particles. (B) Quantification of virion morphologies. Columns show the average of two  
671 independent experiments (more than 100 particles counted per experiment) and error bars  
672 represent standard deviation.

673

#### 674 **Figure 6. Biochemical analysis of class II IN mutant virus particles.**

675 (A) Immunoblot analysis of sedimentation profiles of IN in WT or IN mutant virions. Purified HIV-  
676 1<sub>NLGP</sub> virions were analyzed by equilibrium density centrifugation as detailed in Materials and  
677 Methods. Ten fractions collected from the top of the gradients were analyzed by immunoblotting  
678 using antibodies against IN. Representative images from one of four independent experiments

679 are shown. (B) Quantitation of IN signal intensity in immunoblots as in (A) are shown. Profile of  
680 WT virions is denoted in black, IN mutants that led to bimodal IN distribution are shown in red  
681 and others are shown in grey. Graphed data is the average of two independent experiments and  
682 error bars indicate the range. (C) Representative immunoblot analysis of sedimentation profile  
683 of CA in WT virions and quantitation of CA signal intensity in immunoblots are shown. Profile of  
684 WT virions is denoted in black, IN mutants that led to bimodal IN distribution are shown in red  
685 and others are shown in grey. Graphed data is the average of two independent experiments and  
686 error bars indicate the range.

687

688 **Figure 7. Premature loss of vRNA and IN from class II IN mutant viruses upon infection of**  
689 **target cells.**

690 (A) Locations of the class II IN substitutions K34A, E87A, V165A and R262A/R263A displayed  
691 on a single IN monomer within the context of the HIV-1 IN tetramer intasome structure (PDB  
692 5U1C.) Substitutions are color coded based on whether they putatively caused mislocalization  
693 of IN in virions (black) or not (blue.) (B-E) PgsA-745 cells were infected with WT or IN mutant  
694 HIV-1 virions and fates of viral core components were analyzed 2 hpi. Fractions were analyzed  
695 for the presence of CA (B) and IN (C) by immunoblotting and for RT activity (D) and vRNA (E)  
696 by Q-PCR. Immunoblots are representative of three independent experiments. Graphed data in  
697 (D) and (E) is the average of three independent experiments with error bars indicating standard  
698 deviation (\*P < 0.05 and \*\*P < 0.01, by repeated measures one-way ANOVA.) (F)  
699 Representative images of pgsA-745 cells infected with WT or IN mutant HIV-1<sub>NL4-3</sub> viruses 0 and  
700 2 hpi. Cells were stained for vRNA (green) and nuclei (blue) as detailed in Materials and  
701 Methods. (G) Fraction of viral RNA remaining after 2 and 6 hpi compared to the quantity  
702 measured at 0 hpi. MT-4 cells were synchronously infected with VSV-G pseudotyped HIV-1<sub>NL4-3</sub>  
703 viruses and at each timepoint samples of infected cultures were taken for analysis. Viral RNA

704 levels in samples were measured by Q-PCR and normalized to the levels of GAPDH mRNA.  
705 Data points are the average of five independent experiments with error bars indicating standard  
706 error of the mean.

707

708 **Figure 8. Model depicting how class II IN mutants exert their effects on HIV-1 replication**

709 **Figure S1. Characterization of the replication defects of class II IN mutant viruses.**

710 (A) Reverse-transcriptase activity measured in HIV-1<sub>NL4-3</sub> virion lysates. For each repetition RT  
711 activities for the IN mutants are expressed relative to the WT (set to 1.) Columns show average  
712 of two independent experiments (open circles) and error bars represent standard deviation  
713 (\*\*\*\*P < 0.0001, \*\*\*P < 0.001, \*\*P < 0.01, and \*P < 0.05, by unpaired t test between individual  
714 mutants and WT.) (B) Representative immunoblot analysis of Vpr-IN fusion constructs in cell  
715 lysates. HEK293T cells were co-transfected with the HIV-1<sub>NL4-3</sub> IN<sub>D116N</sub> proviral plasmid along  
716 with Vpr-IN expression plasmids encoding for the indicated IN substitutions or an empty vector  
717 control. Expression of Vpr-IN constructs in cell lysates was detected using an anti-IN antibody.

718

719 **Figure S2. Premature loss of vRNA and IN from class II IN mutant viruses upon infection**  
720 **of target cells.**

721 (A) Representative images of uninfected pgsA-745 cells and cells infected with WT HIV-1<sub>NL4-3</sub>  
722 viruses at 0 hpi. Cells were fixed and stained for vRNA (green) and nuclei (blue). (B)  
723 Representative images of pgsA745 cells infected with IN mutant HIV-1<sub>NL4-3</sub> viruses 0 and 2 hpi.  
724 Cells were fixed and stained for vRNA (green) and nuclei (blue). (C) Quantification of vRNA  
725 remaining in cells infected with WT or IN mutant HIV-1<sub>NL4-3</sub> viruses at 2 hpi. Values are the  
726 percent of vRNA remaining at 2 hpi compared to at 0 hpi. Columns show average of three  
727 independent experiments (open circles) and error bars represent standard deviation (\*P < 0.05  
728 and \*\*P < 0.01, by one-way ANOVA with Dunnett's multiple comparison test.) (D) Fraction of

729 viral RNA remaining after 2 and 6 hpi compared to the quantity measured at 0 hpi. MT-4 cells  
730 were synchronously infected with VSV-G pseudotyped HIV-1<sub>NL4-3</sub> viruses and incubated in the  
731 presence of 50 mM ammonium chloride for 6 hrs. At each timepoint samples of infected cultures  
732 were taken for analysis and levels of viral RNA in samples were measured by Q-PCR and  
733 normalized to the levels of GAPDH mRNA. Data points are the average of three independent  
734 experiments with error bars indicating standard error of the mean.

735

736 **ACKNOWLEDGEMENTS:** We thank Dr. Michael Malim for providing the anti-IN monoclonal  
737 antibody and members of the Tolia lab for assisting in PyMol analysis. This study was supported  
738 by grants NIH grants P50 GM103297 (the Center for HIV RNA Studies) and GM122458  
739 to SBK, AI143389-F31 fellowship to JE, R01 AI062520 to MK and SBK, U54 AI150472 to MK  
740 and AE, AI070042 to AE.

741

## 742 REFERENCES

- 743 1. Sundquist, W.I. and H.G. Krausslich, *HIV-1 assembly, budding, and maturation*. Cold  
744 Spring Harb Perspect Med, 2012. **2**(7): p. a006924.
- 745 2. Pornillos, O. and B.K. Ganser-Pornillos, *Maturation of retroviruses*. Curr Opin Virol,  
746 2019. **36**: p. 47-55.
- 747 3. Bieniasz, P. and A. Telesnitsky, *Multiple, Switchable Protein:RNA Interactions Regulate*  
748 *Human Immunodeficiency Virus Type 1 Assembly*. Annu Rev Virol, 2018. **5**(1): p. 165-  
749 183.
- 750 4. Engelman, A., *Reverse transcription and integration*, in *Retroviruses: Molecular Biology,*  
751 *Genomics and Pathogenesis*, R. Kurth, Bannert, N., Editor. 2010, Caister Academic  
752 Press: Norfolk, UK. p. 129-159.
- 753 5. Engelman, A.N., *Multifaceted HIV integrase functionalities and therapeutic strategies for*  
754 *their inhibition*. J Biol Chem, 2019.
- 755 6. Lesbats, P., A.N. Engelman, and P. Cherepanov, *Retroviral DNA Integration*. Chem Rev,  
756 2016. **116**(20): p. 12730-12757.
- 757 7. Engelman, A.N. and P. Cherepanov, *Retroviral intasomes arising*. Curr Opin Struct Biol,  
758 2017. **47**: p. 23-29.
- 759 8. Ballandras-Colas, A., et al., *A supramolecular assembly mediates lentiviral DNA*  
760 *integration*. Science, 2017. **355**(6320): p. 93-95.
- 761 9. Passos, D.O., et al., *Cryo-EM structures and atomic model of the HIV-1 strand transfer*  
762 *complex intasome*. Science, 2017. **355**(6320): p. 89-92.
- 763 10. Engelman, A., *In vivo analysis of retroviral integrase structure and function*. Adv Virus  
764 Res, 1999. **52**: p. 411-26.

- 765 11. Engelman, A., et al., *Multiple effects of mutations in human immunodeficiency virus type*  
766 *1 integrase on viral replication*. J Virol, 1995. **69**(5): p. 2729-36.
- 767 12. Engelman, A., *The pleiotropic nature of human immunodeficiency virus integrase*  
768 *mutations.*, in *HIV-1 Integrase: Mechanism and Inhibitor Design* N. Neamati, Editor.  
769 2011, John Wiley & Sons, Inc.: Hoboken, N.J. . p. 67-81.
- 770 13. Ansari-Lari, M.A., L.A. Donehower, and R.A. Gibbs, *Analysis of human*  
771 *immunodeficiency virus type 1 integrase mutants*. Virology, 1995. **213**(2): p. 680.
- 772 14. Bukovsky, A. and H. Gottlinger, *Lack of integrase can markedly affect human*  
773 *immunodeficiency virus type 1 particle production in the presence of an active viral*  
774 *protease*. J Virol, 1996. **70**(10): p. 6820-5.
- 775 15. Jenkins, T.M., et al., *A soluble active mutant of HIV-1 integrase: involvement of both the*  
776 *core and carboxyl-terminal domains in multimerization*. J Biol Chem, 1996. **271**(13): p.  
777 7712-8.
- 778 16. Kalpana, G.V., et al., *Isolation and characterization of an oligomerization-negative*  
779 *mutant of HIV-1 integrase*. Virology, 1999. **259**(2): p. 274-85.
- 780 17. Leavitt, A.D., et al., *Human immunodeficiency virus type 1 integrase mutants retain in*  
781 *vitro integrase activity yet fail to integrate viral DNA efficiently during infection*. J Virol,  
782 1996. **70**(2): p. 721-8.
- 783 18. Liao, W.H. and C.T. Wang, *Characterization of human immunodeficiency virus type 1*  
784 *Pr160 gag-pol mutants with truncations downstream of the protease domain*. Virology,  
785 2004. **329**(1): p. 180-8.
- 786 19. Lu, R., H.Z. Ghory, and A. Engelman, *Genetic analyses of conserved residues in the*  
787 *carboxyl-terminal domain of human immunodeficiency virus type 1 integrase*. J Virol,  
788 2005. **79**(16): p. 10356-68.
- 789 20. Lu, R., et al., *Class II integrase mutants with changes in putative nuclear localization*  
790 *signals are primarily blocked at a postnuclear entry step of human immunodeficiency*  
791 *virus type 1 replication*. J Virol, 2004. **78**(23): p. 12735-46.
- 792 21. Nakamura, T., et al., *Lack of infectivity of HIV-1 integrase zinc finger-like domain mutant*  
793 *with morphologically normal maturation*. Biochem Biophys Res Commun, 1997. **239**(3):  
794 p. 715-22.
- 795 22. Quillent, C., et al., *Extensive regions of pol are required for efficient human*  
796 *immunodeficiency virus polyprotein processing and particle maturation*. Virology, 1996.  
797 **219**(1): p. 29-36.
- 798 23. Shin, C.G., et al., *Genetic analysis of the human immunodeficiency virus type 1*  
799 *integrase protein*. J Virol, 1994. **68**(3): p. 1633-42.
- 800 24. Taddeo, B., W.A. Haseltine, and C.M. Farnet, *Integrase mutants of human*  
801 *immunodeficiency virus type 1 with a specific defect in integration*. J Virol, 1994. **68**(12):  
802 p. 8401-5.
- 803 25. Wu, X., et al., *Human immunodeficiency virus type 1 integrase protein promotes reverse*  
804 *transcription through specific interactions with the nucleoprotein reverse transcription*  
805 *complex*. J Virol, 1999. **73**(3): p. 2126-35.
- 806 26. Fontana, J., et al., *Distribution and Redistribution of HIV-1 Nucleocapsid Protein in*  
807 *Immature, Mature, and Integrase-Inhibited Virions: a Role for Integrase in Maturation*. J  
808 Virol, 2015. **89**(19): p. 9765-80.
- 809 27. Jurado, K.A., et al., *Allosteric integrase inhibitor potency is determined through the*  
810 *inhibition of HIV-1 particle maturation*. Proc Natl Acad Sci U S A, 2013. **110**(21): p. 8690-  
811 5.
- 812 28. Kessl, J.J., et al., *HIV-1 Integrase Binds the Viral RNA Genome and Is Essential during*  
813 *Virion Morphogenesis*. Cell, 2016. **166**(5): p. 1257-1268 e12.

- 814 29. Ao, Z., et al., *Contribution of the C-terminal tri-lysine regions of human*  
815 *immunodeficiency virus type 1 integrase for efficient reverse transcription and viral DNA*  
816 *nuclear import*. *Retrovirology*, 2005. **2**: p. 62.
- 817 30. Busschots, K., et al., *Identification of the LEDGF/p75 binding site in HIV-1 integrase*. *J*  
818 *Mol Biol*, 2007. **365**(5): p. 1480-92.
- 819 31. Engelman, A., et al., *Structure-based mutagenesis of the catalytic domain of human*  
820 *immunodeficiency virus type 1 integrase*. *J Virol*, 1997. **71**(5): p. 3507-14.
- 821 32. Limon, A., et al., *Nuclear localization of human immunodeficiency virus type 1*  
822 *preintegration complexes (PICs): V165A and R166A are pleiotropic integrase mutants*  
823 *primarily defective for integration, not PIC nuclear import*. *J Virol*, 2002. **76**(21): p.  
824 10598-607.
- 825 33. Lloyd, A.G., et al., *Characterization of HIV-1 integrase N-terminal mutant viruses*.  
826 *Virology*, 2007. **360**(1): p. 129-35.
- 827 34. Lu, R., et al., *Lys-34, dispensable for integrase catalysis, is required for preintegration*  
828 *complex function and human immunodeficiency virus type 1 replication*. *J Virol*, 2005.  
829 **79**(19): p. 12584-91.
- 830 35. Masuda, T., et al., *Genetic analysis of human immunodeficiency virus type 1 integrase*  
831 *and the U3 att site: unusual phenotype of mutants in the zinc finger-like domain*. *J Virol*,  
832 1995. **69**(11): p. 6687-96.
- 833 36. Rahman, S., et al., *Structure-based mutagenesis of the integrase-LEDGF/p75 interface*  
834 *uncouples a strict correlation between in vitro protein binding and HIV-1 fitness*. *Virology*,  
835 2007. **357**(1): p. 79-90.
- 836 37. Riviere, L., J.L. Darlix, and A. Cimarelli, *Analysis of the viral elements required in the*  
837 *nuclear import of HIV-1 DNA*. *J Virol*, 2010. **84**(2): p. 729-39.
- 838 38. Tsurutani, N., et al., *Identification of critical amino acid residues in human*  
839 *immunodeficiency virus type 1 IN required for efficient proviral DNA formation at steps*  
840 *prior to integration in dividing and nondividing cells*. *J Virol*, 2000. **74**(10): p. 4795-806.
- 841 39. Wiskerchen, M. and M.A. Muesing, *Human immunodeficiency virus type 1 integrase:*  
842 *effects of mutations on viral ability to integrate, direct viral gene expression from*  
843 *unintegrated viral DNA templates, and sustain viral propagation in primary cells*. *J Virol*,  
844 1995. **69**(1): p. 376-86.
- 845 40. Zhu, K., C. Dobard, and S.A. Chow, *Requirement for integrase during reverse*  
846 *transcription of human immunodeficiency virus type 1 and the effect of cysteine*  
847 *mutations of integrase on its interactions with reverse transcriptase*. *J Virol*, 2004.  
848 **78**(10): p. 5045-55.
- 849 41. De Houwer, S., et al., *The HIV-1 integrase mutant R263A/K264A is 2-fold defective for*  
850 *TRN-SR2 binding and viral nuclear import*. *J Biol Chem*, 2014. **289**(36): p. 25351-61.
- 851 42. Johnson, B.C., et al., *A homology model of HIV-1 integrase and analysis of mutations*  
852 *designed to test the model*. *J Mol Biol*, 2013. **425**(12): p. 2133-46.
- 853 43. Mohammed, K.D., M.B. Topper, and M.A. Muesing, *Sequential deletion of the integrase*  
854 *(Gag-Pol) carboxyl terminus reveals distinct phenotypic classes of defective HIV-1*. *J*  
855 *Virol*, 2011. **85**(10): p. 4654-66.
- 856 44. Shehu-Xhilaga, M., et al., *The conformation of the mature dimeric human*  
857 *immunodeficiency virus type 1 RNA genome requires packaging of pol protein*. *J Virol*,  
858 2002. **76**(9): p. 4331-40.
- 859 45. Engelman, A. and R. Craigie, *Identification of conserved amino acid residues critical for*  
860 *human immunodeficiency virus type 1 integrase function in vitro*. *J Virol*, 1992. **66**(11): p.  
861 6361-9.
- 862 46. Lutzke, R.A. and R.H. Plasterk, *Structure-based mutational analysis of the C-terminal*  
863 *DNA-binding domain of human immunodeficiency virus type 1 integrase: critical residues*  
864 *for protein oligomerization and DNA binding*. *J Virol*, 1998. **72**(6): p. 4841-8.



- 865 47. Lutzke, R.A., C. Vink, and R.H. Plasterk, *Characterization of the minimal DNA-binding*  
866 *domain of the HIV integrase protein*. *Nucleic Acids Res*, 1994. **22**(20): p. 4125-31.
- 867 48. Balakrishnan, M., et al., *Non-catalytic site HIV-1 integrase inhibitors disrupt core*  
868 *maturation and induce a reverse transcription block in target cells*. *PLoS One*, 2013.  
869 **8**(9): p. e74163.
- 870 49. Sharma, A., et al., *A new class of multimerization selective inhibitors of HIV-1 integrase*.  
871 *PLoS Pathog*, 2014. **10**(5): p. e1004171.
- 872 50. Le Rouzic, E., et al., *Dual inhibition of HIV-1 replication by integrase-LEDGF allosteric*  
873 *inhibitors is predominant at the post-integration stage*. *Retrovirology*, 2013. **10**: p. 144.
- 874 51. Desimmie, B.A., et al., *LEDGINs inhibit late stage HIV-1 replication by modulating*  
875 *integrase multimerization in the virions*. *Retrovirology*, 2013. **10**: p. 57.
- 876 52. Slaughter, A., et al., *The mechanism of H171T resistance reveals the importance of*  
877 *Ndelta-protonated His171 for the binding of allosteric inhibitor BI-D to HIV-1 integrase*.  
878 *Retrovirology*, 2014. **11**: p. 100.
- 879 53. Amadori, C., et al., *The HIV-1 integrase-LEDGF allosteric inhibitor MUT-A: resistance*  
880 *profile, impairment of virus maturation and infectivity but without influence on RNA*  
881 *packaging or virus immunoreactivity*. *Retrovirology*, 2017. **14**(1): p. 50.
- 882 54. Gupta, K., et al., *Allosteric inhibition of human immunodeficiency virus integrase: late*  
883 *block during viral replication and abnormal multimerization involving specific protein*  
884 *domains*. *J Biol Chem*, 2014. **289**(30): p. 20477-88.
- 885 55. Bonnard, D., et al., *Structure-function analyses unravel distinct effects of allosteric*  
886 *inhibitors of HIV-1 integrase on viral maturation and integration*. *J Biol Chem*, 2018.  
887 **293**(16): p. 6172-6186.
- 888 56. Deng, N., et al., *Allosteric HIV-1 Integrase Inhibitors Promote Aberrant Protein*  
889 *Multimerization by Directly Mediating Inter-Subunit Interactions: Structural and*  
890 *Thermodynamic Modeling Studies*. *Protein Sci*, 2016.
- 891 57. Feng, L., et al., *The A128T resistance mutation reveals aberrant protein multimerization*  
892 *as the primary mechanism of action of allosteric HIV-1 integrase inhibitors*. *J Biol Chem*,  
893 2013. **288**(22): p. 15813-20.
- 894 58. Gupta, K., et al., *Structural Basis for Inhibitor-Induced Aggregation of HIV Integrase*.  
895 *PLoS Biol*, 2016. **14**(12): p. e1002584.
- 896 59. Koneru, P.C., et al., *HIV-1 integrase tetramers are the antiviral target of pyridine-based*  
897 *allosteric integrase inhibitors*. *Elife*, 2019. **8**.
- 898 60. Kessl, J.J., et al., *Multimode, cooperative mechanism of action of allosteric HIV-1*  
899 *integrase inhibitors*. *J Biol Chem*, 2012. **287**(20): p. 16801-11.
- 900 61. Engelman, A. and P. Cherepanov, *Retroviral Integrase Structure and DNA*  
901 *Recombination Mechanism*. *Microbiol Spectr*, 2014. **2**(6).
- 902 62. Tekeste, S.S., et al., *Interaction between Reverse Transcriptase and Integrase Is*  
903 *Required for Reverse Transcription during HIV-1 Replication*. *J Virol*, 2015. **89**(23): p.  
904 12058-69.
- 905 63. van Bel, N., et al., *The allosteric HIV-1 integrase inhibitor BI-D affects virion maturation*  
906 *but does not influence packaging of a functional RNA genome*. *PLoS One*, 2014. **9**(7): p.  
907 e103552.
- 908 64. Madison, M.K., et al., *Allosteric HIV-1 Integrase Inhibitors Lead to Premature*  
909 *Degradation of the Viral RNA Genome and Integrase in Target Cells*. *J Virol*, 2017.  
910 **91**(17).
- 911 65. Zennou, V., et al., *APOBEC3G incorporation into human immunodeficiency virus type 1*  
912 *particles*. *J Virol*, 2004. **78**(21): p. 12058-61.
- 913 66. Cowan, S., et al., *Cellular inhibitors with Fv1-like activity restrict human and simian*  
914 *immunodeficiency virus tropism*. *Proc Natl Acad Sci U S A*, 2002. **99**(18): p. 11914-9.

- 915 67. Hatzioannou, T., et al., *Restriction of multiple divergent retroviruses by Lv1 and Ref1*.  
916 EMBO J, 2003. **22**(3): p. 385-94.
- 917 68. Liu, H., et al., *Incorporation of functional human immunodeficiency virus type 1 integrase*  
918 *into virions independent of the Gag-Pol precursor protein*. J Virol, 1997. **71**(10): p. 7704-  
919 10.
- 920 69. Bouyac-Bertoia, M., et al., *HIV-1 infection requires a functional integrase NLS*. Mol Cell,  
921 2001. **7**(5): p. 1025-35.
- 922 70. Pizzato, M., et al., *A one-step SYBR Green I-based product-enhanced reverse*  
923 *transcriptase assay for the quantitation of retroviruses in cell culture supernatants*. J  
924 Virol Methods, 2009. **156**(1-2): p. 1-7.
- 925 71. Kutluay, S.B., et al., *Global changes in the RNA binding specificity of HIV-1 gag regulate*  
926 *virion genesis*. Cell, 2014. **159**(5): p. 1096-109.
- 927 72. Kutluay, S.B. and P.D. Bieniasz, *Analysis of HIV-1 Gag-RNA Interactions in Cells and*  
928 *Virions by CLIP-seq*. Methods Mol Biol, 2016. **1354**: p. 119-31.
- 929 73. Cherepanov, P., *LEDGF/p75 interacts with divergent lentiviral integrases and modulates*  
930 *their enzymatic activity in vitro*. Nucleic Acids Res, 2007. **35**(1): p. 113-24.
- 931 74. Kutluay, S.B., D. Perez-Caballero, and P.D. Bieniasz, *Fates of retroviral core*  
932 *components during unrestricted and TRIM5-restricted infection*. PLoS Pathog, 2013.  
933 **9**(3): p. e1003214.
- 934 75. Puray-Chavez, M., et al., *Multiplex single-cell visualization of nucleic acids and protein*  
935 *during HIV infection*. Nat Commun, 2017. **8**(1): p. 1882.
- 936 76. Englund, G., et al., *Integration is required for productive infection of monocyte-derived*  
937 *macrophages by human immunodeficiency virus type 1*. J Virol, 1995. **69**(5): p. 3216-9.
- 938 77. Petit, C., O. Schwartz, and F. Mammano, *Oligomerization within virions and subcellular*  
939 *localization of human immunodeficiency virus type 1 integrase*. J Virol, 1999. **73**(6): p.  
940 5079-88.
- 941 78. Eijkelenboom, A.P., et al., *Refined solution structure of the C-terminal DNA-binding*  
942 *domain of human immunodeficiency virus type 1 integrase*. Proteins, 1999. **36**(4): p. 556-64.
- 943 79. Hare, S., et al., *Structural basis for functional tetramerization of lentiviral integrase*. PLoS  
944 Pathog, 2009. **5**(7): p. e1000515.
- 945 80. Kessl, J.J., et al., *An allosteric mechanism for inhibiting HIV-1 integrase with a small*  
946 *molecule*. Mol Pharmacol, 2009. **76**(4): p. 824-32.
- 947 81. Li, X., Y. Koh, and A. Engelman, *Correlation of recombinant integrase activity and*  
948 *functional preintegration complex formation during acute infection by replication-*  
949 *defective integrase mutant human immunodeficiency virus*. J Virol, 2012. **86**(7): p. 3861-  
950 79.
- 951 82. Fletcher, T.M., 3rd, et al., *Complementation of integrase function in HIV-1 virions*. EMBO  
952 J, 1997. **16**(16): p. 5123-38.
- 953 83. Welker, R., et al., *Biochemical and structural analysis of isolated mature cores of human*  
954 *immunodeficiency virus type 1*. J Virol, 2000. **74**(3): p. 1168-77.
- 955 84. Briggs, J.A., et al., *The stoichiometry of Gag protein in HIV-1*. Nat Struct Mol Biol, 2004.  
956 **11**(7): p. 672-5.
- 957 85. Ganser-Pornillos, B.K., A. Cheng, and M. Yeager, *Structure of full-length HIV-1 CA: a*  
958 *model for the mature capsid lattice*. Cell, 2007. **131**(1): p. 70-9.
- 959 86. Konnyu, B., et al., *Gag-Pol processing during HIV-1 virion maturation: a systems biology*  
960 *approach*. PLoS Comput Biol, 2013. **9**(6): p. e1003103.
- 961 87. Pettit, S.C., et al., *Ordered processing of the human immunodeficiency virus type 1*  
962 *GagPol precursor is influenced by the context of the embedded viral protease*. J Virol,  
963 2005. **79**(16): p. 10601-7.

- 964 88. Maldarelli, F., M.A. Martin, and K. Strebel, *Identification of posttranscriptionally active*  
965 *inhibitory sequences in human immunodeficiency virus type 1 RNA: novel level of gene*  
966 *regulation*. J Virol, 1991. **65**(11): p. 5732-43.
- 967 89. Schwartz, S., et al., *Mutational inactivation of an inhibitory sequence in human*  
968 *immunodeficiency virus type 1 results in Rev-independent gag expression*. J Virol, 1992.  
969 **66**(12): p. 7176-82.
- 970 90. Schwartz, S., B.K. Felber, and G.N. Pavlakis, *Distinct RNA sequences in the gag region*  
971 *of human immunodeficiency virus type 1 decrease RNA stability and inhibit expression in*  
972 *the absence of Rev protein*. J Virol, 1992. **66**(1): p. 150-9.
- 973 91. Wu, X. and G. Brewer, *The regulation of mRNA stability in mammalian cells: 2.0*. Gene,  
974 2012. **500**(1): p. 10-21.
- 975 92. Gorelick, R.J., et al., *Characterization of the block in replication of nucleocapsid protein*  
976 *zinc finger mutants from moloney murine leukemia virus*. J Virol, 1999. **73**(10): p. 8185-  
977 95.
- 978 93. Miyazaki, Y., et al., *An RNA structural switch regulates diploid genome packaging by*  
979 *Moloney murine leukemia virus*. J Mol Biol, 2010. **396**(1): p. 141-52.
- 980 94. Sakuragi, J., T. Shioda, and A.T. Panganiban, *Duplication of the primary encapsidation*  
981 *and dimer linkage region of human immunodeficiency virus type 1 RNA results in the*  
982 *appearance of monomeric RNA in virions*. J Virol, 2001. **75**(6): p. 2557-65.
- 983 95. Mulder, L.C. and M.A. Muesing, *Degradation of HIV-1 integrase by the N-end rule*  
984 *pathway*. J Biol Chem, 2000. **275**(38): p. 29749-53.
- 985 96. Ali, H., et al., *Cellular TRIM33 restrains HIV-1 infection by targeting viral integrase for*  
986 *proteasomal degradation*. Nat Commun, 2019. **10**(1): p. 926.
- 987 97. Llano, M., et al., *Lens epithelium-derived growth factor/p75 prevents proteasomal*  
988 *degradation of HIV-1 integrase*. J Biol Chem, 2004. **279**(53): p. 55570-7.
- 989 98. Zheng, Y., et al., *Host protein Ku70 binds and protects HIV-1 integrase from*  
990 *proteasomal degradation and is required for HIV replication*. J Biol Chem, 2011. **286**(20):  
991 p. 17722-35.
- 992 99. Devroe, E., A. Engelman, and P.A. Silver, *Intracellular transport of human*  
993 *immunodeficiency virus type 1 integrase*. J Cell Sci, 2003. **116**(Pt 21): p. 4401-8.  
994

A

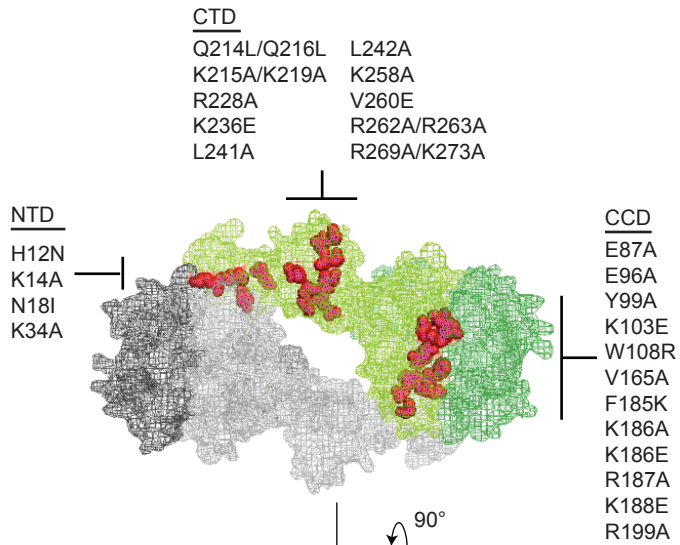

B

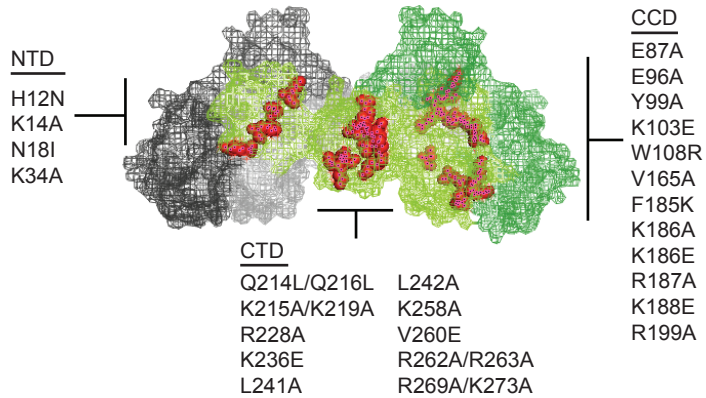

Figure 1

**A**

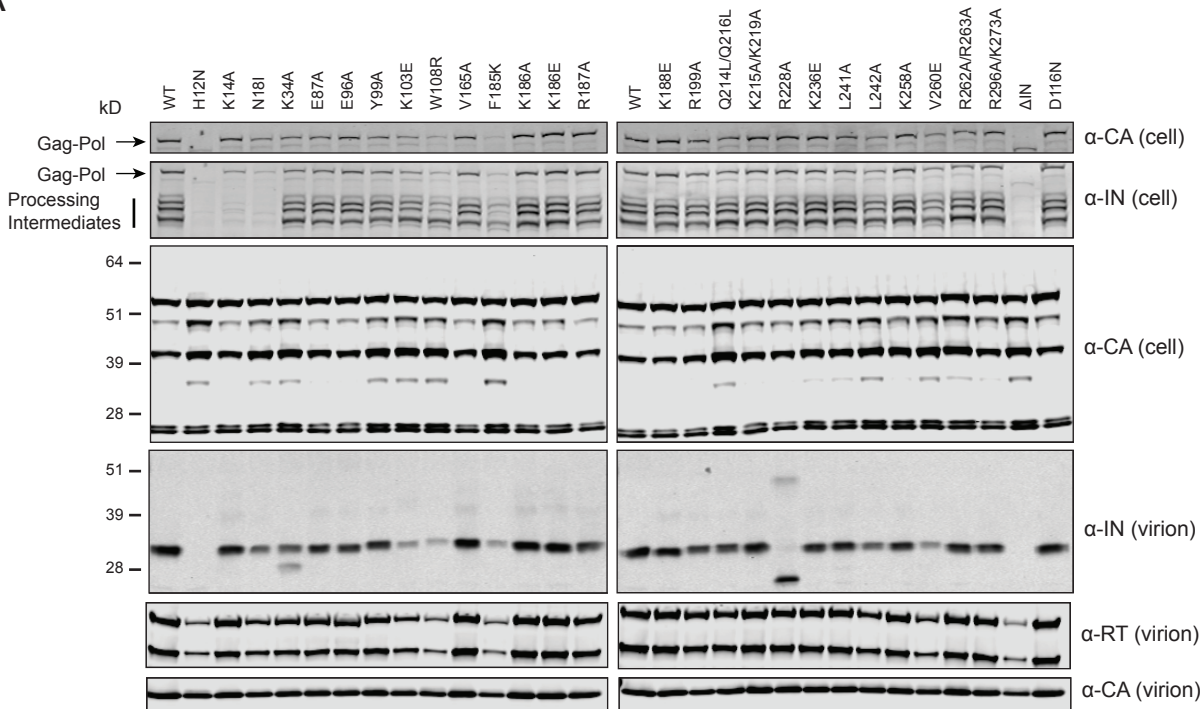

**B**

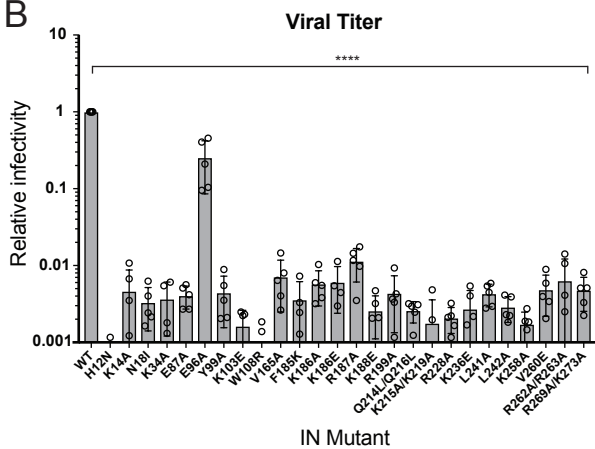

**C**

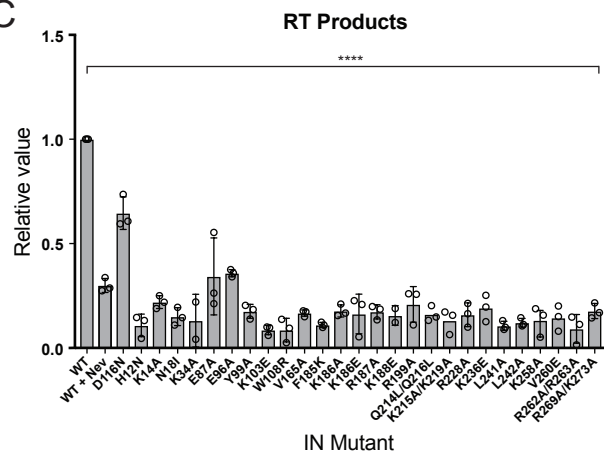

**D**

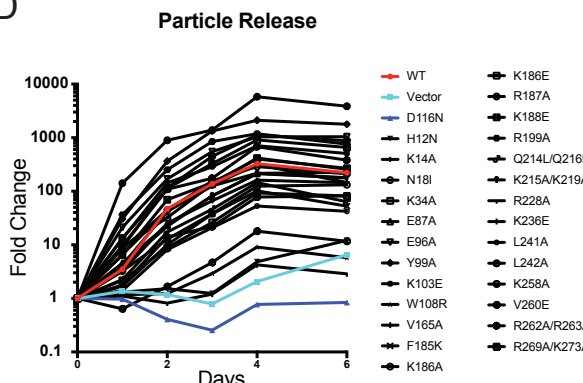

**E**

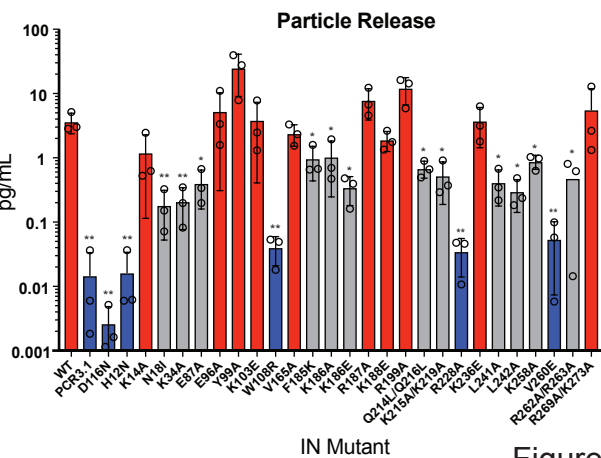

Figure 2

A

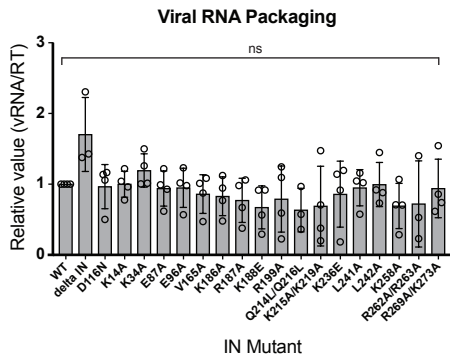

B

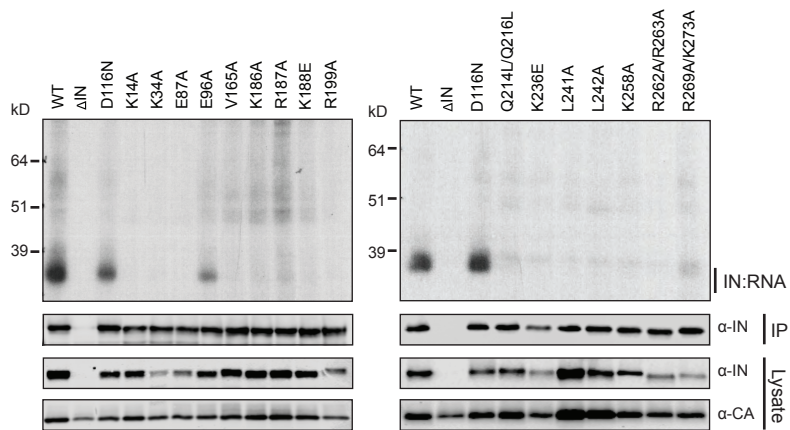

Figure 3

**A**

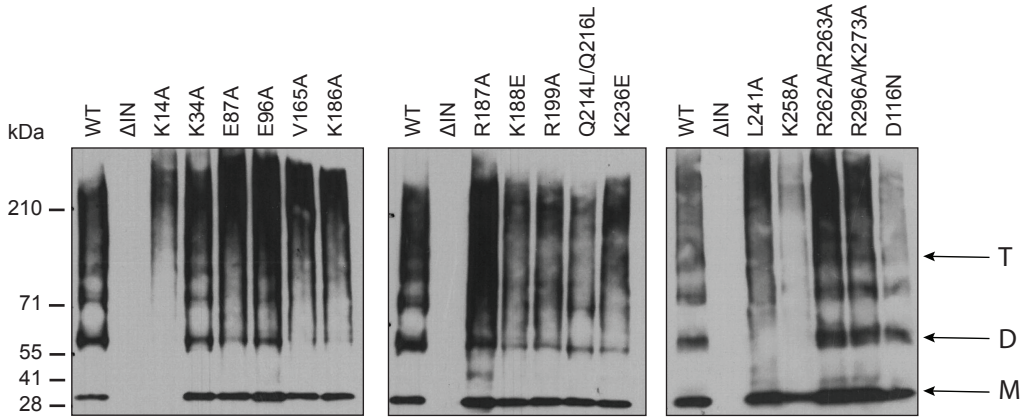

**B**

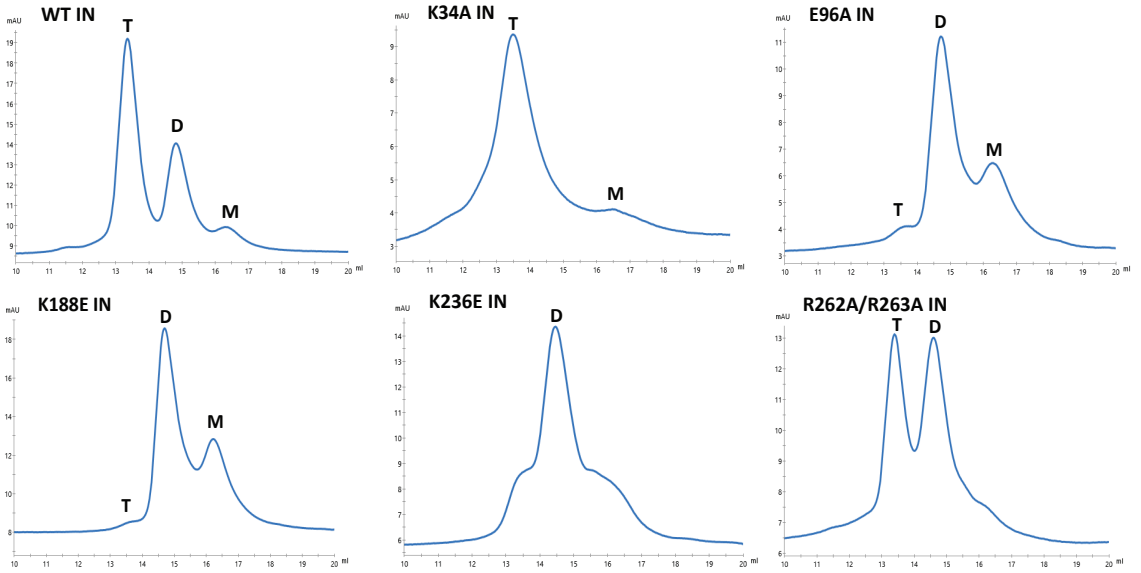

**C**

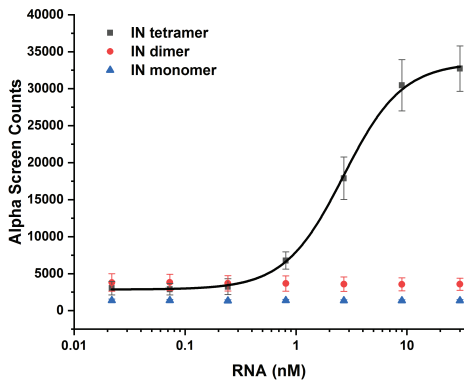

**D**

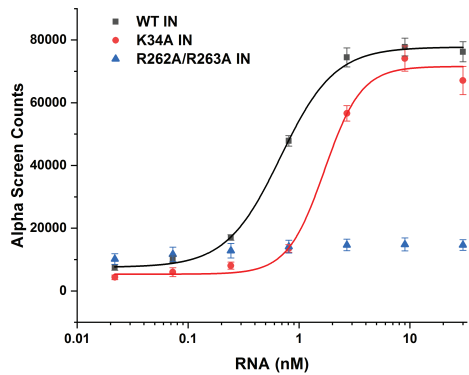

Figure 4

A

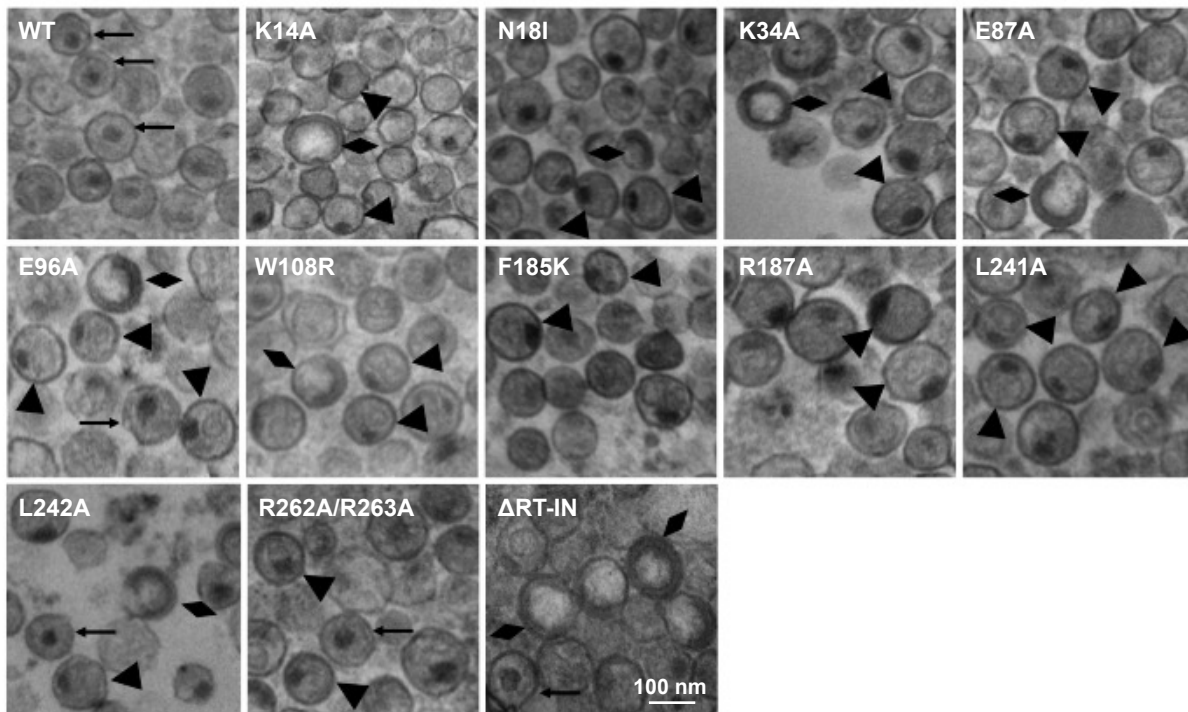

B

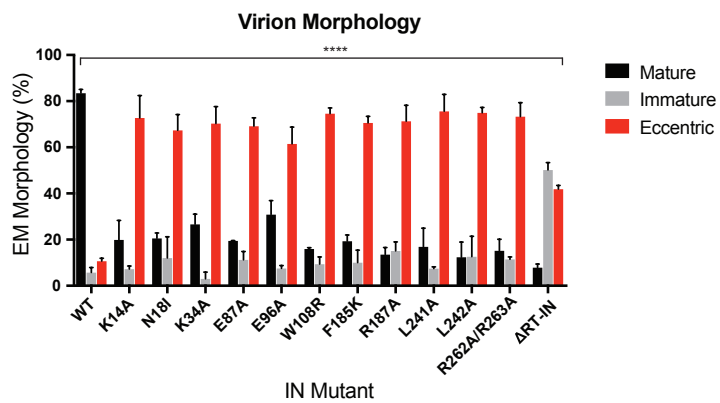

Figure 5



A

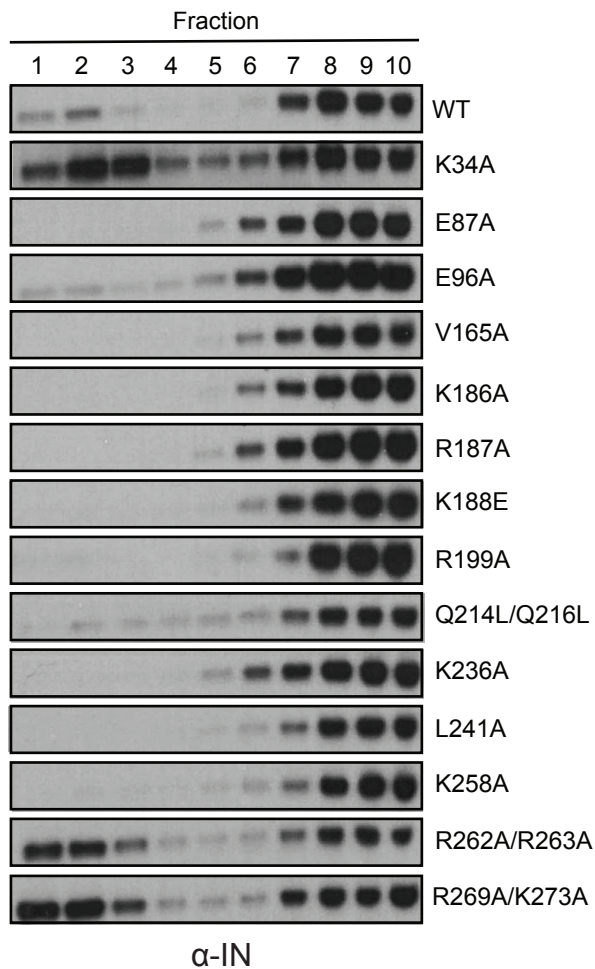

B

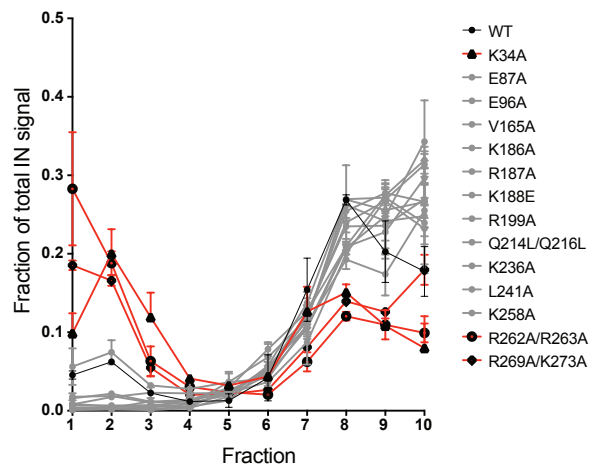

C

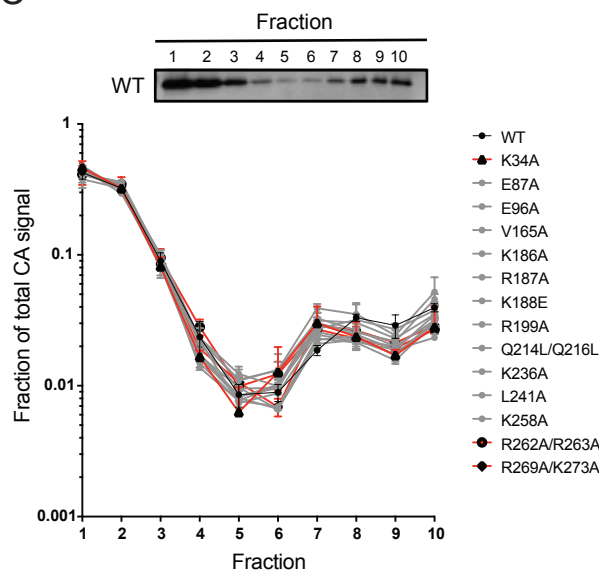

Figure 6

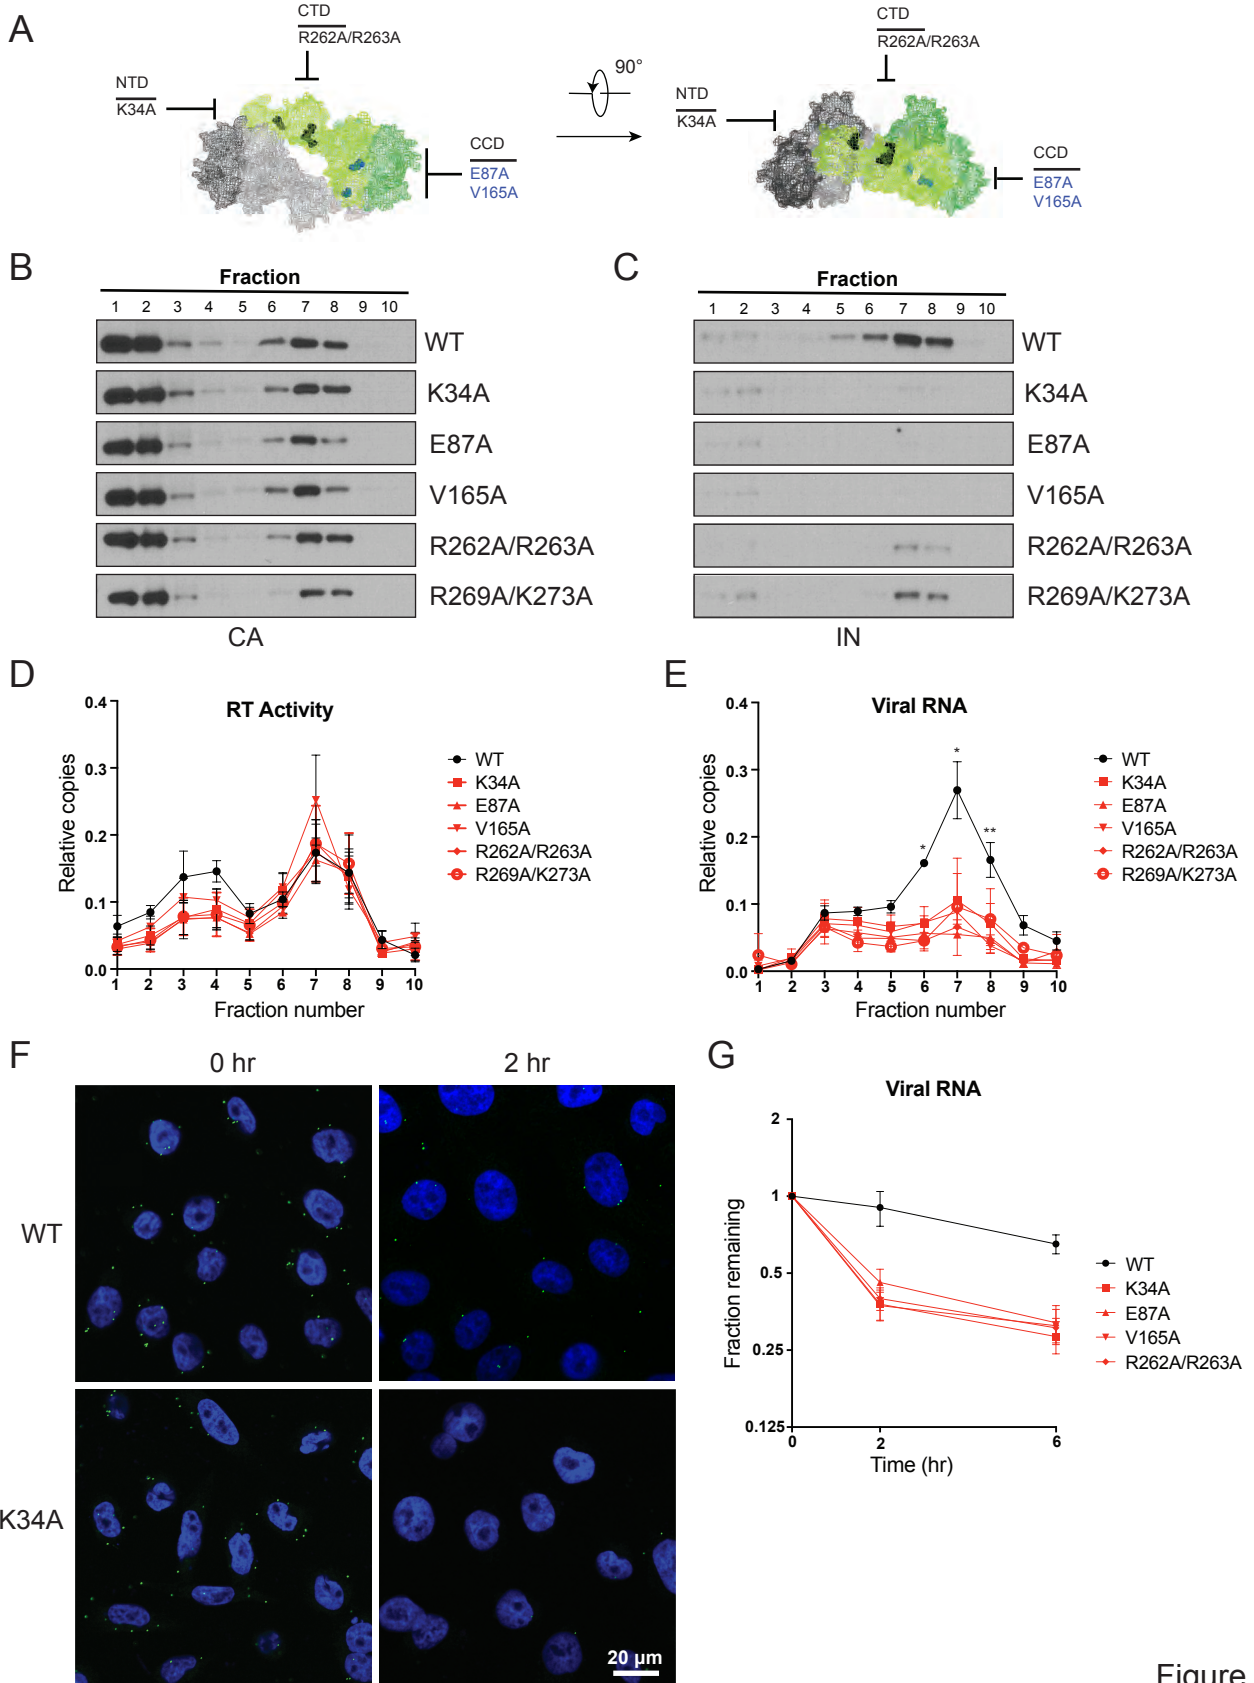

Figure 7

# WT HIV-1

IN binds vRNA

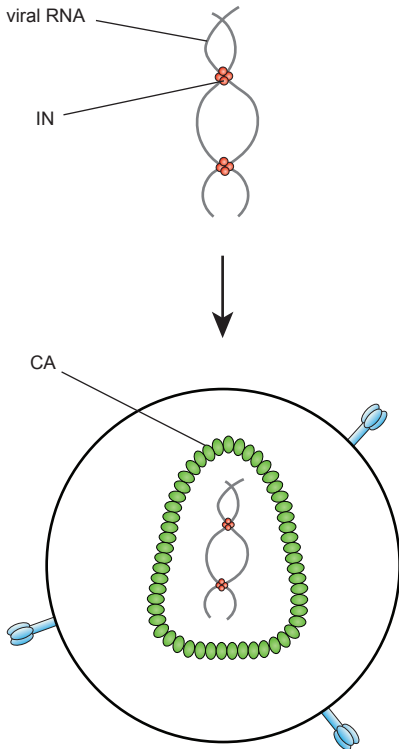

Mature virus particle

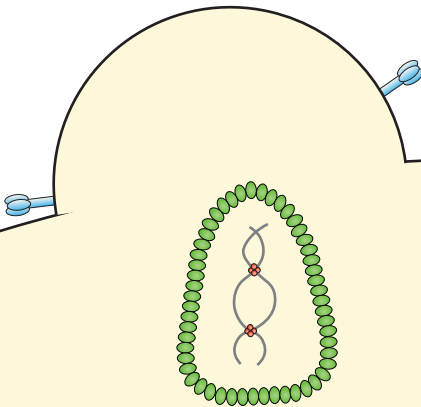

Successful reverse-transcription

# Class II IN Mutant HIV-1

IN cannot bind vRNA

- ii. IN multimerization defect
- iii. Direct IN-RNA binding defect
- i. IN reduced

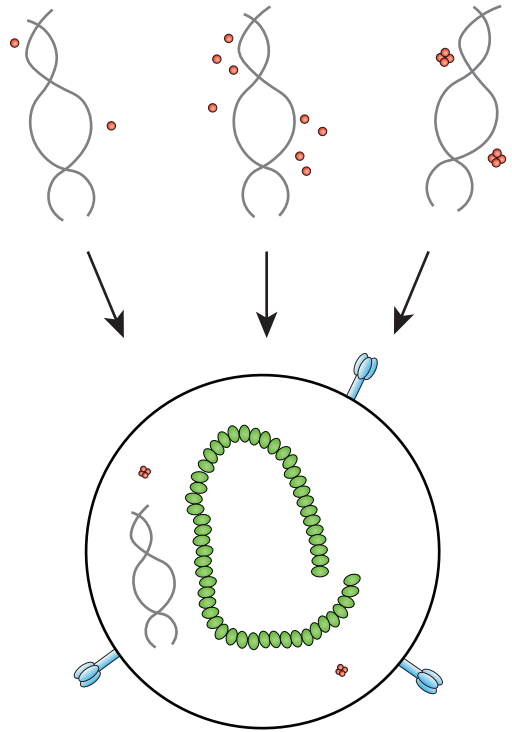

Eccentric virus particle

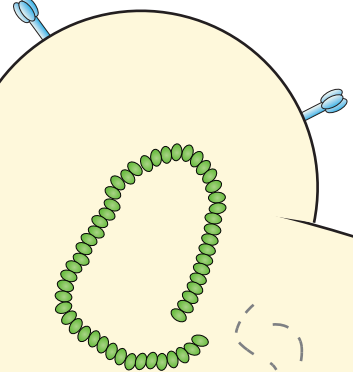

vRNA and IN lost,  
reverse-transcription not completed

Figure 8

**Table 1: IN levels in virions**

| <b>IN mutant</b> | <b>IN signal (%)</b> | <b>SD</b> | <b>IN mutant</b> | <b>IN signal (%)</b> | <b>SD</b> |
|------------------|----------------------|-----------|------------------|----------------------|-----------|
| WT               | 100                  | N/A       | K186E            | 63.2                 | 16.4      |
| H12N             | ND                   | N/A       | R187A            | 34.4                 | 24.5      |
| K14A             | 40.5                 | 10.3      | K188E            | 45.8                 | 26.3      |
| N18I             | 16.7                 | 3.1       | R199A            | 41.1                 | 19.2      |
| K34A             | 32.6                 | 6.9       | Q214L/Q216L      | 31.7                 | 6.3       |
| E87A             | 31.4                 | 16.1      | K215A/K219A      | 47.7                 | 20.4      |
| E96A             | 38.4                 | 31.2      | R228A            | 50.2                 | 26.4      |
| Y99A             | 22.0                 | 10.3      | K236E            | 37.4                 | 14.0      |
| K103E            | 6.8                  | 2.3       | L241A            | 41.4                 | 12.4      |
| W108R            | 2.7                  | 0.3       | L242A            | 13.7                 | 3.5       |
| V165A            | 55.6                 | 32.8      | K258A            | 36.7                 | 19.7      |
| F185K            | 2.5                  | 1.6       | V260E            | 6.0                  | 4.0       |
| K186A            | 69.4                 | 27.9      | R262A/R263A      | 52.9                 | 7.0       |

Quantitation of IN in virions as measured by immunoblotting. For each experiment IN signal was normalized to CA signal for each virus, and the resulting value compared to that of WT (set at 100%.) Reported values are the average value (as percent of WT) and standard deviation (SD) between 4 independent experiments. Mutants with less than 20% IN signal of WT are highlighted in gray.

A

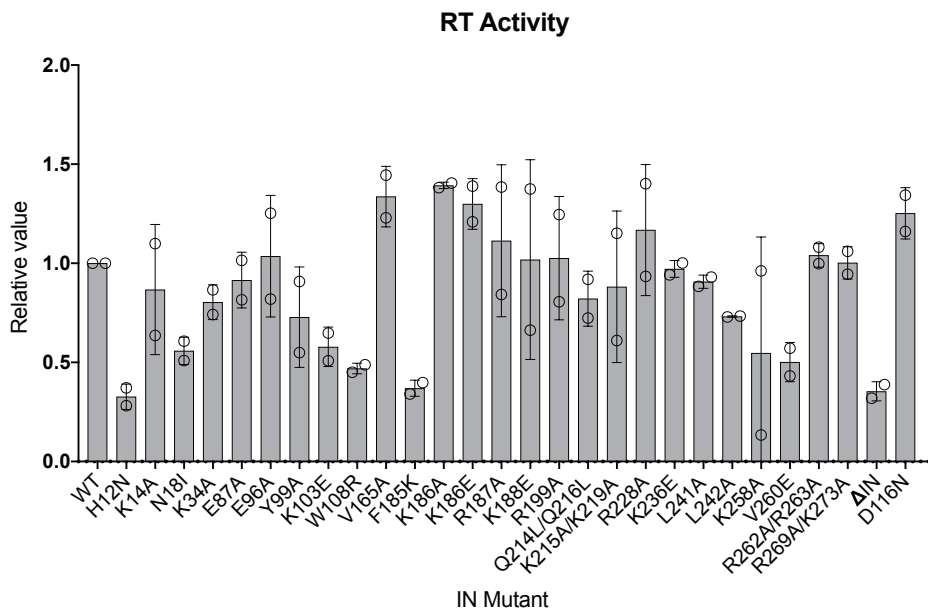

B

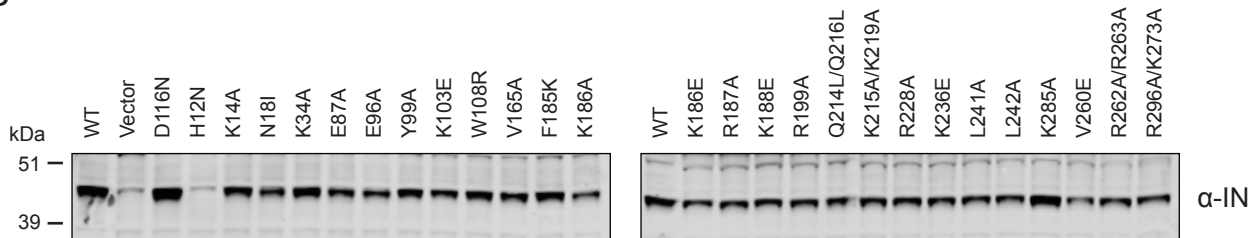

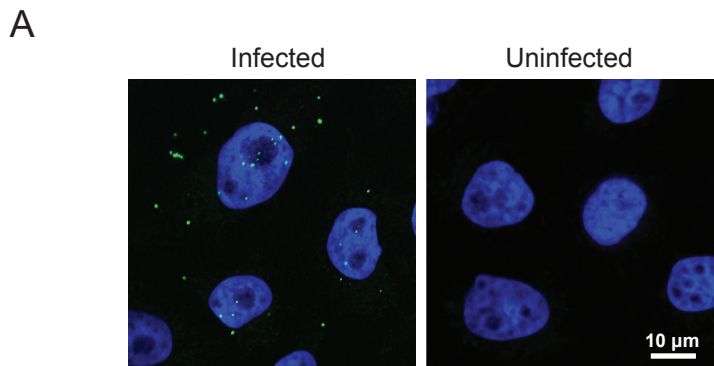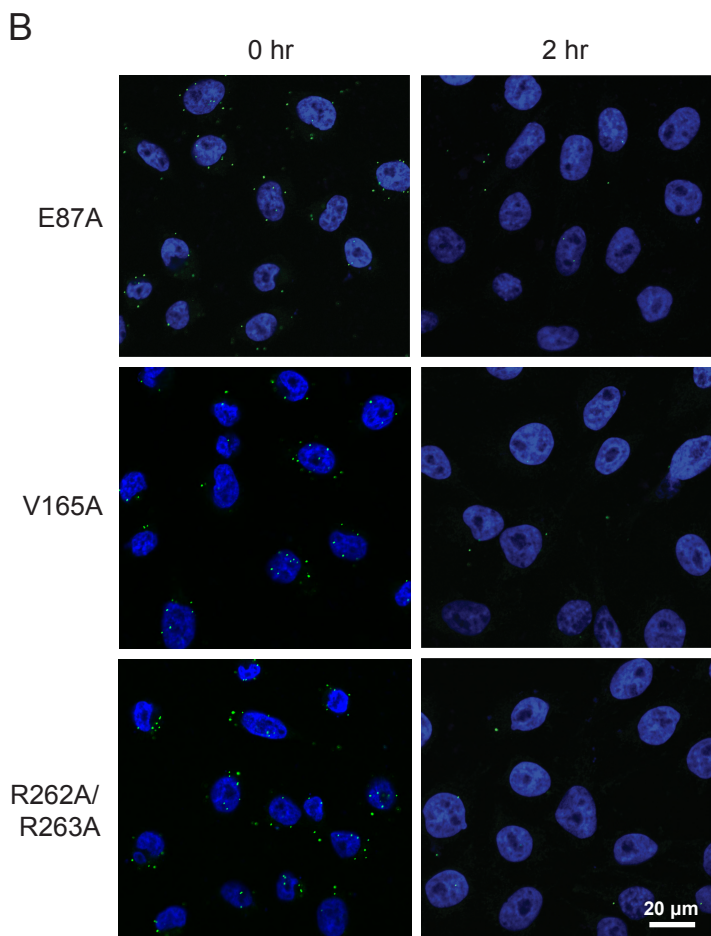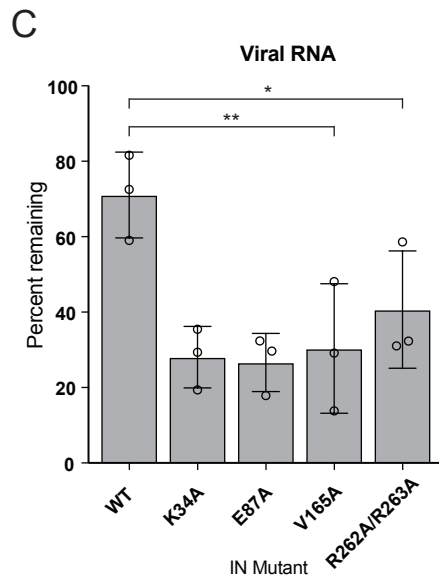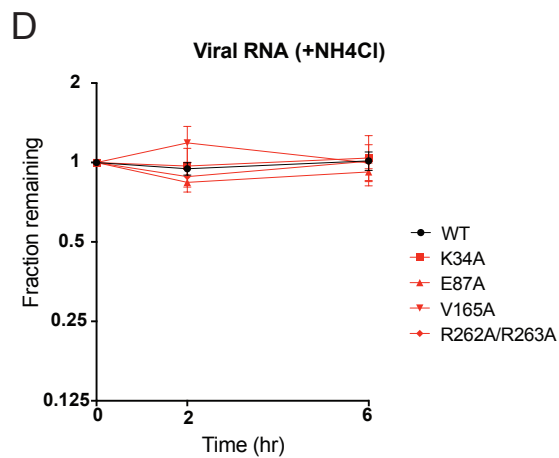

Source: https://www.biorxiv.org/content/biorxiv/early/2019/12/19/2019.12.18.881649.full.pdf
